# Supplementary material
Source: publisher site journal article supplement (https://www.dovepress.com/get_supplementary_file.php?f=276553.docx)
Supplement: Supplementary file 1 [file get_supplementary_file.php]

**Figure S1.** The statistical chart of the expresson of 6 genes in normal tissues and tumor tissues in TCGA dataset


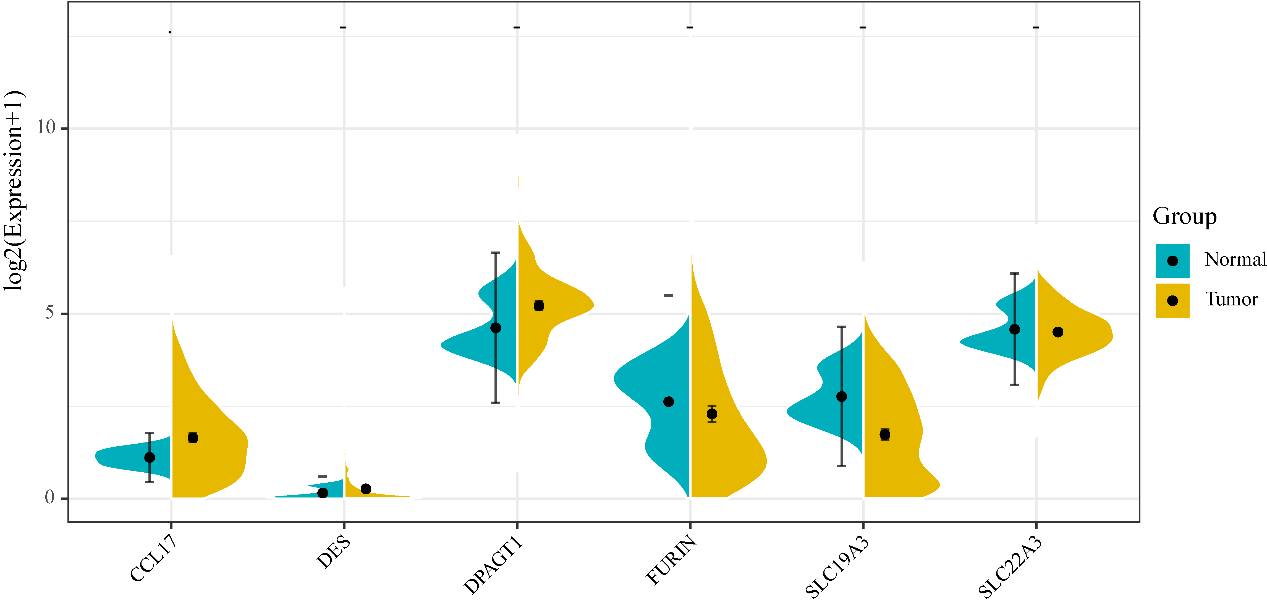


Figure S2. The nomogram and decision curve analysis


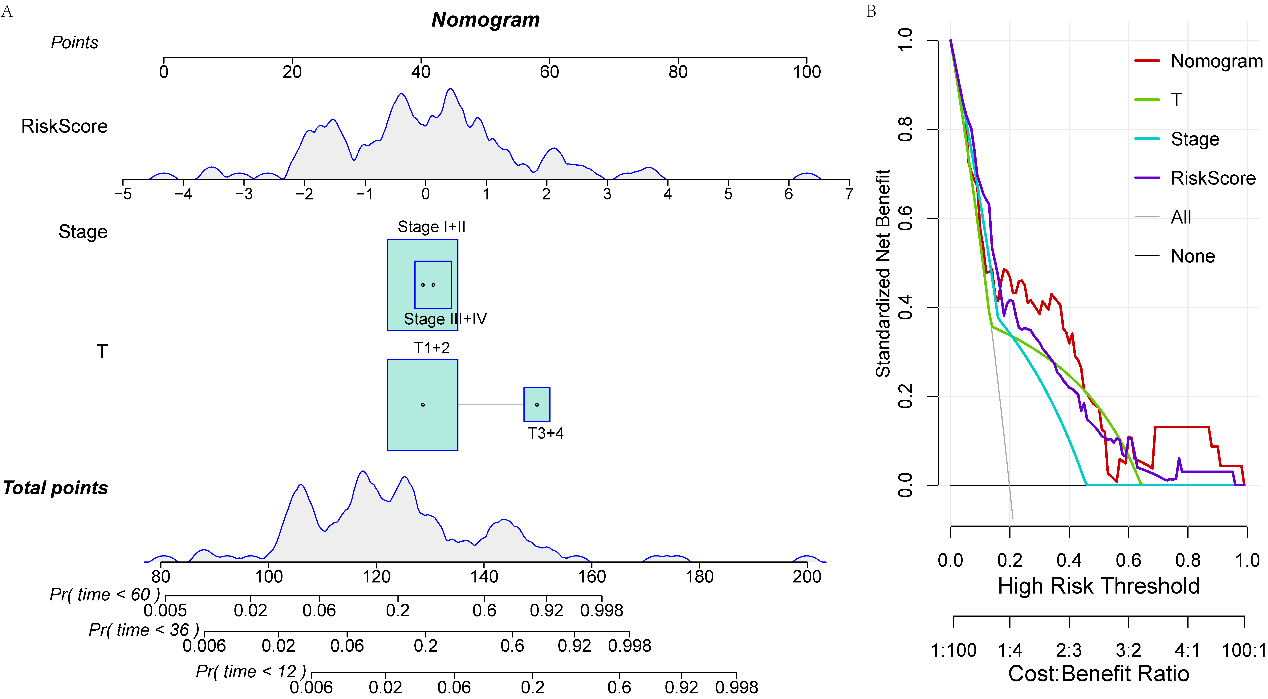


A: nomogram established by T, Stage, and RiskScore; B: nomogram and DCA curve of T, Stage, and RiskScore.

Figure S3. The comparison of the 6-gene model with existing signatures


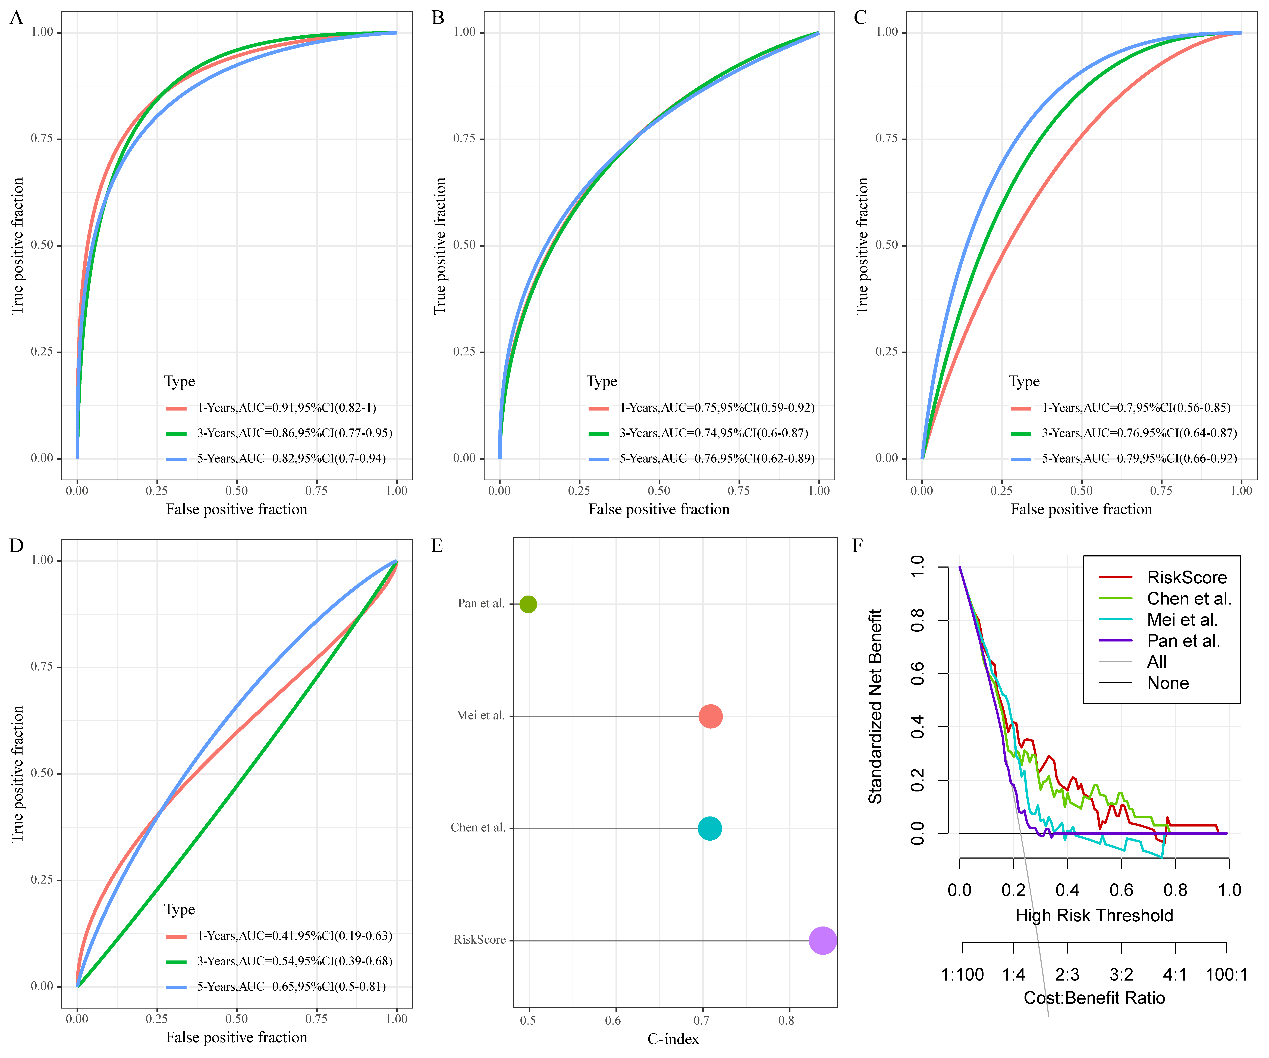


Fig: A-D are the ROC curves of RiskScore, Chen et al., Mei et al., Pan et al. respectively; E: C-index of four models, F: DCA curve of four models.

Table S1. The clinical information of TCGA training datasets, TCGA test datasets and GSE44001 independent validation datasets

| **Characteristic** | | **TCGA training datasets(n=146)** | **TCGA test datasets(n=147)** | **GSE44001(n=300)** |
| --- | --- | --- | --- | --- |
| **Age(years)** | <=50 | 93 | 89 |  |
| >50 | 53 | 58 |  |
| **Survival Status** | Living | 113 | 108 |  |
| Dead | 33 | 39 |  |
| **Grade** | G 1 | 7 | 12 |  |
| G 2 | 62 | 67 |  |
| G 3 | 59 | 58 |  |
| G4 | 0 | 1 |  |
| **pathologic_T** | T 1 | 68 | 69 |  |
| T 2 | 35 | 33 |  |
| T 3 | 7 | 10 |  |
| T 4 | 7 | 3 |  |
| **pathologic_N** | N 0 | 58 | 71 |  |
| N 1 | 28 | 28 |  |
| N 2 | 0 | 0 |  |
| N 3 | 0 | 0 |  |
| **pathologic_M** | M 0 | 52 | 55 |  |
| M 1/ M X | 69 | 69 |  |
| **Tumor Stage** | Stage Ⅰ | 73 | 86 | 258 |
| Stage Ⅱ | 33 | 31 | 42 |
| Stage Ⅲ | 21 | 21 | 0 |
| Stage Ⅳ | 14 | 8 | 0 |
| **Pathology** | Squamous | 146 | 147 | 300 |

| Table S2. The prognostic candidate genes by univariate Cox regression analysis | | | | |
| --- | --- | --- | --- | --- |
| gene | HR | coefficient | z socre | p value |
| ENSG00000167578 | 0.619598553 | -0.478683505 | -2.060148208 | 0.039384374 |
| ENSG00000164283 | 1.447191751 | 0.369624955 | 2.367449816 | 0.017911149 |
| ENSG00000176928 | 0.637385904 | -0.450379992 | -2.287606068 | 0.022160472 |
| ENSG00000205362 | 1.361107213 | 0.308298496 | 2.006368238 | 0.044816974 |
| ENSG00000143183 | 1.794419083 | 0.584681339 | 2.576515936 | 0.00998016 |
| ENSG00000117394 | 1.512417066 | 0.413709077 | 2.031846255 | 0.042169223 |
| ENSG00000181991 | 0.596502332 | -0.516672128 | -2.47118074 | 0.013466774 |
| ENSG00000115685 | 0.646079724 | -0.436832372 | -2.168006702 | 0.030158177 |
| ENSG00000158481 | 0.499930939 | -0.693285312 | -2.636398081 | 0.008379137 |
| ENSG00000243543 | 1.326863725 | 0.282818056 | 2.425877655 | 0.015271418 |
| ENSG00000168811 | 0.606097877 | -0.500713793 | -2.005947881 | 0.044861809 |
| ENSG00000132031 | 1.363575805 | 0.310110517 | 2.94707463 | 0.003207958 |
| ENSG00000083444 | 1.425600041 | 0.354592807 | 1.972904811 | 0.048506408 |
| ENSG00000145982 | 0.657220762 | -0.419735302 | -2.18587118 | 0.028825031 |
| ENSG00000267206 | 0.310456662 | -1.169710962 | -2.034271573 | 0.041924222 |
| ENSG00000183206 | 1.242865509 | 0.217419608 | 2.495022083 | 0.012594929 |
| ENSG00000187325 | 0.683406989 | -0.380664712 | -2.009336129 | 0.044501499 |
| ENSG00000056972 | 1.464611135 | 0.381589771 | 2.162932237 | 0.030546392 |
| ENSG00000183066 | 0.642466272 | -0.442440959 | -2.115419539 | 0.034394206 |
| ENSG00000009844 | 1.621263414 | 0.483205731 | 2.190349894 | 0.028498871 |
| ENSG00000116690 | 1.35313985 | 0.302427707 | 2.82849328 | 0.004676768 |
| ENSG00000104804 | 1.361982105 | 0.308941069 | 2.063457023 | 0.039069227 |
| ENSG00000234068 | 2.327949533 | 0.844987851 | 3.447858782 | 0.000565049 |
| ENSG00000103043 | 0.647873529 | -0.434059773 | -2.583809878 | 0.009771564 |
| ENSG00000118113 | 1.400423047 | 0.336774367 | 2.13684516 | 0.032610588 |
| ENSG00000112697 | 1.553255118 | 0.440352805 | 2.026451523 | 0.042718536 |
| ENSG00000015285 | 0.635311696 | -0.453639541 | -2.333351783 | 0.01962969 |
| ENSG00000197782 | 1.477867019 | 0.390599845 | 2.325323843 | 0.02005465 |
| ENSG00000167004 | 1.443855756 | 0.367317144 | 1.966251257 | 0.049269594 |
| ENSG00000197498 | 1.447399415 | 0.369768439 | 2.11635134 | 0.034314937 |
| ENSG00000157500 | 1.566288049 | 0.44870852 | 2.100480083 | 0.035686631 |
| ENSG00000162601 | 1.517441896 | 0.417025954 | 2.200944978 | 0.027739919 |
| ENSG00000127947 | 1.828370213 | 0.603424976 | 2.900884381 | 0.003721111 |
| ENSG00000110324 | 0.686180992 | -0.376613849 | -1.961446598 | 0.049826949 |
| ENSG00000105397 | 0.665666474 | -0.406966524 | -2.298336897 | 0.021542622 |
| ENSG00000025770 | 0.599349812 | -0.511909859 | -2.900392028 | 0.003726962 |
| ENSG00000132429 | 1.406138012 | 0.340846948 | 2.557023762 | 0.010557201 |
| ENSG00000064419 | 1.577109925 | 0.455594011 | 2.459004702 | 0.013932279 |
| ENSG00000198517 | 1.557486354 | 0.44307321 | 2.265119755 | 0.023505332 |
| ENSG00000111846 | 0.593658128 | -0.521451667 | -2.383671922 | 0.017140876 |
| ENSG00000136490 | 0.597390921 | -0.515183571 | -2.822539989 | 0.004764488 |
| ENSG00000136819 | 0.676401122 | -0.390969003 | -2.126133774 | 0.033492122 |
| ENSG00000137496 | 0.653372272 | -0.425608218 | -2.118388589 | 0.034142172 |
| ENSG00000251493 | 0.603789686 | -0.504529343 | -2.618493457 | 0.008831899 |
| ENSG00000128482 | 1.415837923 | 0.347721527 | 2.275123069 | 0.022898548 |
| ENSG00000013375 | 1.597236139 | 0.468274723 | 2.641042917 | 0.008265125 |
| ENSG00000112799 | 0.636444995 | -0.451857282 | -2.190251906 | 0.028505973 |
| ENSG00000169188 | 0.591543622 | -0.52501985 | -2.908299519 | 0.003634001 |
| ENSG00000235173 | 1.664044527 | 0.509251101 | 2.752085884 | 0.005921699 |
| ENSG00000060566 | 1.495181329 | 0.40224749 | 3.263227031 | 0.001101512 |
| ENSG00000072818 | 0.575448629 | -0.552605317 | -2.596487734 | 0.009418227 |
| ENSG00000158623 | 1.511675259 | 0.413218479 | 2.212936879 | 0.026901998 |
| ENSG00000169313 | 0.494470651 | -0.704267481 | -2.032191491 | 0.042134274 |
| ENSG00000172432 | 1.548156792 | 0.437065057 | 2.228515557 | 0.025846155 |
| ENSG00000157800 | 1.479408048 | 0.39164204 | 2.199734127 | 0.027825764 |
| ENSG00000131165 | 0.681898733 | -0.382874118 | -2.178711159 | 0.029353132 |
| ENSG00000164934 | 1.528631174 | 0.424372677 | 2.585887478 | 0.009712863 |
| ENSG00000161958 | 1.430472408 | 0.358004745 | 2.139057247 | 0.032431032 |
| ENSG00000166387 | 0.690607078 | -0.370184244 | -2.095439917 | 0.036131904 |
| ENSG00000139514 | 1.50284027 | 0.407356831 | 2.220352818 | 0.026394827 |
| ENSG00000140368 | 0.55186003 | -0.594460834 | -2.750835237 | 0.005944353 |
| ENSG00000226733 | 1.278138646 | 0.245404837 | 2.163945027 | 0.030468569 |
| ENSG00000125354 | 0.688310258 | -0.373515586 | -2.093936838 | 0.036265607 |
| ENSG00000162692 | 0.60925552 | -0.495517526 | -2.092494723 | 0.036394283 |
| ENSG00000118873 | 1.504320691 | 0.408341428 | 2.140355751 | 0.032326028 |
| ENSG00000204161 | 0.633565824 | -0.456391379 | -2.112323535 | 0.034658709 |
| ENSG00000117114 | 1.462818559 | 0.380365094 | 2.044463629 | 0.040907767 |
| ENSG00000197430 | 0.104812833 | -2.255579065 | -1.964495521 | 0.049472655 |
| ENSG00000125772 | 1.441509223 | 0.365690637 | 2.000410782 | 0.045455925 |
| ENSG00000112742 | 1.548561686 | 0.437326555 | 2.167992018 | 0.030159294 |
| ENSG00000186854 | 1.46958359 | 0.384979088 | 2.46572909 | 0.013673471 |
| ENSG00000182257 | 0.644610496 | -0.439109027 | -1.992773846 | 0.046286217 |
| ENSG00000253506 | 0.493231912 | -0.706775806 | -2.293305657 | 0.021830414 |
| ENSG00000128739 | 0.585993565 | -0.534446471 | -2.916658262 | 0.003538032 |
| ENSG00000212938 | 1.33094918 | 0.285892357 | 3.089666748 | 0.002003812 |
| ENSG00000140365 | 0.635051726 | -0.454048825 | -2.108577911 | 0.034981031 |
| ENSG00000184083 | 0.668361073 | -0.402926723 | -2.053943559 | 0.039981155 |
| ENSG00000124253 | 1.343456385 | 0.295245685 | 3.258281924 | 0.00112089 |
| ENSG00000124588 | 0.673305753 | -0.395555738 | -2.039949449 | 0.041355361 |
| ENSG00000180921 | 1.634533557 | 0.491357477 | 2.527454446 | 0.011489273 |
| ENSG00000198677 | 1.579503662 | 0.45711066 | 2.27680918 | 0.022797623 |
| ENSG00000111218 | 1.193423644 | 0.176826189 | 2.046004609 | 0.040755917 |
| ENSG00000185189 | 1.493438445 | 0.401081142 | 2.079979764 | 0.037527389 |
| ENSG00000044574 | 1.492213304 | 0.400260457 | 2.139758104 | 0.032374321 |
| ENSG00000099622 | 0.686906078 | -0.37555771 | -2.064889286 | 0.038933477 |
| ENSG00000204642 | 0.736724196 | -0.305541682 | -1.965431842 | 0.049364277 |
| ENSG00000164744 | 1.348665552 | 0.299115624 | 2.975474101 | 0.002925361 |
| ENSG00000106278 | 0.654756692 | -0.423491575 | -2.201594938 | 0.027693934 |
| ENSG00000204237 | 0.675021627 | -0.393010549 | -2.209503472 | 0.027139641 |
| ENSG00000031081 | 0.641175537 | -0.444452011 | -2.14128079 | 0.032251401 |
| ENSG00000153443 | 0.677398245 | -0.38949593 | -2.15849651 | 0.030889249 |
| ENSG00000152484 | 1.556987393 | 0.442752796 | 1.996868992 | 0.045839416 |
| ENSG00000087884 | 0.547490817 | -0.60240959 | -2.525286932 | 0.011560386 |
| ENSG00000188610 | 1.453773409 | 0.374162527 | 2.08875619 | 0.036729676 |
| ENSG00000067048 | 1.394685025 | 0.332668602 | 3.393920053 | 0.000688998 |
| ENSG00000132386 | 0.578034218 | -0.548122211 | -2.650493104 | 0.008037437 |
| ENSG00000142700 | 0.662991185 | -0.410993585 | -1.998753312 | 0.045635052 |
| ENSG00000090554 | 0.483645013 | -0.726404085 | -3.256853134 | 0.001126547 |
| ENSG00000139496 | 1.628630603 | 0.487739541 | 2.334447998 | 0.019572276 |
| ENSG00000104979 | 0.533270505 | -0.628726469 | -2.557916394 | 0.010530141 |
| ENSG00000115085 | 0.612442871 | -0.490299612 | -2.392136453 | 0.016750614 |
| ENSG00000127870 | 1.683139982 | 0.520661086 | 2.534150215 | 0.01127204 |
| ENSG00000164944 | 1.66267112 | 0.508425417 | 2.924733108 | 0.003447518 |
| ENSG00000172738 | 0.473336447 | -0.74794884 | -3.191129221 | 0.001417179 |
| ENSG00000075213 | 1.364953069 | 0.311120046 | 1.972022032 | 0.048607091 |
| ENSG00000146433 | 1.427274498 | 0.35576668 | 2.064628756 | 0.03895814 |
| ENSG00000158457 | 0.680888658 | -0.384356484 | -1.97259863 | 0.048541309 |
| ENSG00000198786 | 1.570789453 | 0.451578329 | 2.151406881 | 0.031444099 |
| ENSG00000183624 | 0.618565532 | -0.48035214 | -2.41120507 | 0.015899906 |
| ENSG00000188542 | 0.622379656 | -0.474204993 | -2.251058314 | 0.024381844 |
| ENSG00000140876 | 0.620755854 | -0.476817424 | -2.582230455 | 0.009816401 |
| ENSG00000151552 | 0.680193122 | -0.385378518 | -2.198513463 | 0.027912536 |
| ENSG00000107223 | 0.575119606 | -0.553177249 | -2.390295464 | 0.016834823 |
| ENSG00000182111 | 1.512713231 | 0.41390488 | 3.420985132 | 0.000623947 |
| ENSG00000183597 | 0.655029693 | -0.423074712 | -2.152024058 | 0.03139546 |
| ENSG00000085514 | 0.598957304 | -0.512564963 | -2.316174548 | 0.02054874 |
| ENSG00000183747 | 1.292214376 | 0.256357317 | 2.056568841 | 0.039727718 |
| ENSG00000105778 | 1.575274293 | 0.454429412 | 2.263271349 | 0.023618967 |
| ENSG00000170681 | 1.376172333 | 0.319305974 | 2.029278394 | 0.042429943 |
| ENSG00000123552 | 1.420662898 | 0.351123592 | 2.383690826 | 0.017139996 |
| ENSG00000164695 | 2.022437407 | 0.704303421 | 3.310506443 | 0.000931273 |
| ENSG00000147687 | 1.528967598 | 0.424592735 | 2.474681714 | 0.013335496 |
| ENSG00000099250 | 1.515984849 | 0.416065293 | 2.555634827 | 0.010599429 |
| ENSG00000105011 | 0.678568561 | -0.387769757 | -2.193046243 | 0.028304048 |
| ENSG00000167984 | 0.647199955 | -0.435099983 | -2.08359207 | 0.037197289 |
| ENSG00000078549 | 1.243266331 | 0.217742055 | 2.102526339 | 0.035507195 |
| ENSG00000006015 | 0.623992669 | -0.471616659 | -2.111646095 | 0.034716816 |
| ENSG00000125817 | 0.722210245 | -0.325438984 | -2.02682674 | 0.042680135 |
| ENSG00000235568 | 0.664395187 | -0.408878145 | -1.971907633 | 0.048620152 |
| ENSG00000269858 | 0.509131411 | -0.675049122 | -2.532149499 | 0.011336565 |
| ENSG00000258947 | 1.36623617 | 0.312059638 | 2.041727062 | 0.041178613 |
| ENSG00000116922 | 1.575611851 | 0.454643674 | 2.163801512 | 0.030479586 |
| ENSG00000143499 | 1.609383885 | 0.475851426 | 2.594615566 | 0.009469677 |
| ENSG00000230667 | 0.634164398 | -0.455447055 | -2.425893396 | 0.015270755 |
| ENSG00000106341 | 1.378670955 | 0.321119959 | 2.492276518 | 0.012692718 |
| ENSG00000136936 | 0.708893701 | -0.344049692 | -2.013644492 | 0.044046872 |
| ENSG00000085491 | 1.567699774 | 0.449609433 | 2.2361123 | 0.025344416 |
| ENSG00000165837 | 1.313713524 | 0.272857878 | 2.101857455 | 0.035565764 |
| ENSG00000133321 | 0.649887492 | -0.43095602 | -2.440006688 | 0.01468699 |
| ENSG00000182827 | 1.614328149 | 0.478918863 | 2.311982462 | 0.02077865 |
| ENSG00000180475 | 1.315892497 | 0.27451514 | 2.500752885 | 0.012392962 |
| ENSG00000187987 | 1.305112198 | 0.266289013 | 2.066577995 | 0.038773936 |
| ENSG00000143493 | 1.513124344 | 0.414176615 | 2.109286605 | 0.03491985 |
| ENSG00000185608 | 0.562627077 | -0.575138256 | -2.853400067 | 0.004325413 |
| ENSG00000255835 | 0.593379141 | -0.521921723 | -2.028707262 | 0.042488116 |
| ENSG00000088836 | 0.675537165 | -0.392247105 | -2.020561644 | 0.043325163 |
| ENSG00000213123 | 0.620447399 | -0.477314451 | -2.573962313 | 0.010054122 |
| ENSG00000240682 | 0.560008033 | -0.579804151 | -2.752844668 | 0.005907992 |
| ENSG00000130159 | 0.649798299 | -0.431093273 | -2.298928117 | 0.021509021 |
| ENSG00000178809 | 0.556973736 | -0.585237193 | -2.408908788 | 0.016000296 |
| ENSG00000174652 | 0.68237326 | -0.382178469 | -2.389236643 | 0.016883424 |
| ENSG00000113327 | 1.513257567 | 0.414264656 | 3.784384898 | 0.000154089 |
| ENSG00000196998 | 0.653688046 | -0.425125036 | -2.338721838 | 0.019349834 |
| ENSG00000145824 | 0.583239961 | -0.53915658 | -2.781309511 | 0.005414009 |
| ENSG00000184293 | 0.554872808 | -0.589016367 | -2.125927468 | 0.033509299 |
| ENSG00000174450 | 1.353068463 | 0.302374949 | 2.452763145 | 0.014176365 |
| ENSG00000180096 | 0.596665901 | -0.516397952 | -2.560909225 | 0.010439863 |
| ENSG00000110484 | 1.384646923 | 0.325445178 | 2.734683257 | 0.006244033 |
| ENSG00000214944 | 0.641932479 | -0.443272153 | -2.385890742 | 0.017037812 |
| ENSG00000132600 | 0.650645916 | -0.429789692 | -2.305980579 | 0.021111718 |
| ENSG00000167549 | 0.662517205 | -0.411708751 | -2.038215512 | 0.041528385 |
| ENSG00000079462 | 0.673419904 | -0.395386215 | -1.963154707 | 0.0496282 |
| ENSG00000111796 | 0.681049443 | -0.384120372 | -1.981193377 | 0.047569592 |
| ENSG00000146192 | 0.674866084 | -0.393241002 | -2.032752885 | 0.042077495 |
| ENSG00000118156 | 0.6801447 | -0.38544971 | -2.031440474 | 0.042210332 |
| ENSG00000162383 | 1.454782154 | 0.374856167 | 2.598279954 | 0.009369207 |
| ENSG00000196550 | 1.431827987 | 0.35895194 | 2.029982381 | 0.04235833 |
| ENSG00000105248 | 0.551257899 | -0.595552523 | -3.107280668 | 0.00188817 |
| ENSG00000262660 | 0.496262088 | -0.700651088 | -2.125398651 | 0.033553363 |
| ENSG00000100288 | 0.593679724 | -0.521415289 | -2.436261423 | 0.014839955 |
| ENSG00000196358 | 0.518194202 | -0.657405199 | -2.111332038 | 0.034743782 |
| ENSG00000204316 | 1.367813167 | 0.313213236 | 2.059466219 | 0.039449598 |
| ENSG00000168454 | 1.231138458 | 0.207939317 | 2.364371737 | 0.01806068 |
| ENSG00000093009 | 0.662168187 | -0.412235696 | -2.466546648 | 0.013642296 |
| ENSG00000184584 | 0.698071061 | -0.359434375 | -2.070134296 | 0.03843977 |
| ENSG00000274267 | 0.613358523 | -0.488805647 | -2.195175192 | 0.028151033 |
| ENSG00000213658 | 0.649694526 | -0.431252987 | -2.116914409 | 0.034267113 |
| ENSG00000110934 | 0.655385807 | -0.422531199 | -2.257767039 | 0.023960187 |
| ENSG00000244038 | 1.507147821 | 0.410219004 | 2.075548608 | 0.037935719 |
| ENSG00000089723 | 1.537244305 | 0.429991401 | 2.381365242 | 0.0172486 |
| ENSG00000186562 | 1.280200621 | 0.247016801 | 2.339672961 | 0.019300632 |
| ENSG00000136240 | 1.429212144 | 0.357123344 | 2.008995682 | 0.044537592 |
| ENSG00000198692 | 1.275066991 | 0.242998719 | 2.463628584 | 0.013753855 |
| ENSG00000148826 | 1.33806775 | 0.291226596 | 2.767129934 | 0.005655221 |
| ENSG00000198089 | 0.650592521 | -0.429871761 | -2.26513627 | 0.023504318 |
| ENSG00000187800 | 1.59176287 | 0.464842125 | 2.961590437 | 0.003060546 |
| ENSG00000105835 | 1.555384549 | 0.441722813 | 2.445549782 | 0.014463148 |
| ENSG00000162433 | 1.577304531 | 0.455717397 | 2.18670395 | 0.028764143 |
| ENSG00000110446 | 0.549146863 | -0.599389363 | -3.135239233 | 0.00171714 |
| ENSG00000185482 | 0.621289134 | -0.475958712 | -2.440035832 | 0.014685805 |
| ENSG00000186790 | 0.505970862 | -0.681276196 | -2.606264761 | 0.009153568 |
| ENSG00000112599 | 1.364449189 | 0.310750823 | 2.027600492 | 0.042601039 |
| ENSG00000123908 | 1.74836082 | 0.558678675 | 2.864982901 | 0.004170318 |
| ENSG00000087253 | 1.528924449 | 0.424564514 | 2.394070908 | 0.016662527 |
| ENSG00000104969 | 0.651047316 | -0.429172957 | -2.351158578 | 0.018715056 |
| ENSG00000119285 | 1.577480182 | 0.455828753 | 2.369831278 | 0.017796204 |
| ENSG00000105717 | 0.673941369 | -0.394612161 | -2.127389585 | 0.033387727 |
| ENSG00000131351 | 0.621348188 | -0.475863665 | -2.565443843 | 0.01030439 |
| ENSG00000182415 | 1.306278208 | 0.267182031 | 2.65073217 | 0.00803175 |
| ENSG00000075702 | 0.681985043 | -0.382747552 | -2.043858222 | 0.040967555 |
| ENSG00000184831 | 0.619836872 | -0.478298945 | -2.206375848 | 0.027357695 |
| ENSG00000183137 | 1.573708412 | 0.45343488 | 2.688445603 | 0.007178553 |
| ENSG00000182346 | 1.53377327 | 0.427730889 | 3.454641931 | 0.000551024 |
| ENSG00000179144 | 0.696197157 | -0.362122388 | -1.969159495 | 0.048934779 |
| ENSG00000118271 | 1.282069643 | 0.248475681 | 2.514109391 | 0.011933341 |
| ENSG00000100522 | 1.534952726 | 0.428499583 | 2.268851945 | 0.023277331 |
| ENSG00000147119 | 0.575771753 | -0.552043959 | -2.716200707 | 0.006603587 |
| ENSG00000185149 | 1.179139743 | 0.164785141 | 1.963065208 | 0.049638598 |
| ENSG00000099795 | 0.474603832 | -0.745274861 | -2.816434449 | 0.004855995 |
| ENSG00000167083 | 0.563547444 | -0.573503755 | -2.625036332 | 0.008663972 |
| ENSG00000089692 | 0.567136835 | -0.567154673 | -2.648751298 | 0.008078976 |
| ENSG00000132517 | 0.633212225 | -0.456949645 | -2.300825722 | 0.021401484 |
| ENSG00000250423 | 1.182048267 | 0.167248753 | 2.02124832 | 0.043254066 |
| ENSG00000135525 | 1.861558785 | 0.621414193 | 2.914799597 | 0.00355917 |
| ENSG00000198885 | 0.587538322 | -0.531813806 | -2.578781106 | 0.009914959 |
| ENSG00000241258 | 1.497227126 | 0.403614814 | 2.259576941 | 0.02384752 |
| ENSG00000144736 | 1.510186844 | 0.412233381 | 2.064130421 | 0.039005352 |
| ENSG00000131473 | 1.546605346 | 0.43606243 | 2.641111142 | 0.008263461 |
| ENSG00000096384 | 1.893808003 | 0.638589618 | 3.319957959 | 0.00090031 |
| ENSG00000143032 | 1.233747261 | 0.210056092 | 2.377435367 | 0.017433498 |
| ENSG00000139433 | 0.594040398 | -0.520807951 | -2.602329168 | 0.009259293 |
| ENSG00000107736 | 0.242049853 | -1.418611572 | -2.647455098 | 0.008110013 |
| ENSG00000100360 | 0.634707511 | -0.454590998 | -2.206083504 | 0.027378153 |
| ENSG00000068697 | 1.46551319 | 0.382205482 | 2.232490708 | 0.025582549 |
| ENSG00000182095 | 1.552114009 | 0.439617879 | 2.219325272 | 0.026464604 |
| ENSG00000072506 | 0.472876883 | -0.748920215 | -3.211124165 | 0.001322168 |
| ENSG00000066405 | 1.244376623 | 0.2186347 | 2.321089015 | 0.02028204 |
| ENSG00000198633 | 1.262541578 | 0.233126814 | 2.541472806 | 0.011038653 |
| ENSG00000169136 | 0.610836986 | -0.492925154 | -2.378362864 | 0.017389704 |
| ENSG00000105393 | 0.62039133 | -0.477404822 | -2.142595274 | 0.032145611 |
| ENSG00000181631 | 0.570931101 | -0.560486741 | -2.460304315 | 0.013881925 |
| ENSG00000124608 | 1.532498111 | 0.426899156 | 2.632787858 | 0.008468723 |
| ENSG00000105607 | 0.642250749 | -0.442776477 | -2.516468676 | 0.011853744 |
| ENSG00000105609 | 0.545522791 | -0.606010695 | -2.333498577 | 0.019621993 |
| ENSG00000164485 | 0.4159778 | -0.877123385 | -1.986110817 | 0.04702102 |
| ENSG00000112715 | 1.647226536 | 0.499092986 | 2.420383257 | 0.015504157 |
| ENSG00000174473 | 1.258912572 | 0.23024831 | 2.121660473 | 0.03386626 |
| ENSG00000250378 | 0.580522167 | -0.543827293 | -2.06042474 | 0.039357954 |
| ENSG00000182162 | 0.555003028 | -0.588781709 | -2.434808308 | 0.014899681 |
| ENSG00000111700 | 1.306177101 | 0.267104628 | 2.027864238 | 0.042574106 |
| ENSG00000163600 | 0.594959528 | -0.519261896 | -2.409429948 | 0.015977463 |
| ENSG00000162951 | 1.28113401 | 0.247745631 | 2.753384231 | 0.005898263 |
| ENSG00000269242 | 0.471792379 | -0.751216265 | -3.09219552 | 0.001986819 |
| ENSG00000077312 | 0.588296708 | -0.530523853 | -2.745060751 | 0.00604997 |
| ENSG00000170290 | 1.389215746 | 0.328739377 | 2.123328158 | 0.033726363 |
| ENSG00000214643 | 1.338230416 | 0.291348156 | 2.406511055 | 0.016105717 |
| ENSG00000012817 | 1.344333659 | 0.295898469 | 3.05900818 | 0.002220711 |
| ENSG00000181135 | 1.441816478 | 0.365903762 | 2.115315696 | 0.03440305 |
| ENSG00000213822 | 1.222274156 | 0.200713186 | 1.982982211 | 0.047369417 |
| ENSG00000177984 | 1.490696673 | 0.399243576 | 3.402126637 | 0.000668636 |
| ENSG00000105993 | 1.508507628 | 0.411120836 | 1.977166507 | 0.048022812 |
| ENSG00000153207 | 1.539329707 | 0.431347066 | 2.200470637 | 0.027773521 |
| ENSG00000087903 | 0.692299935 | -0.367735985 | -2.005135617 | 0.044948551 |
| ENSG00000120526 | 1.428745158 | 0.356796547 | 2.009076683 | 0.044529002 |
| ENSG00000164631 | 1.518847928 | 0.417952106 | 2.168940163 | 0.030087227 |
| ENSG00000176853 | 1.714636866 | 0.539201318 | 2.433601567 | 0.014949441 |
| ENSG00000164879 | 1.502544537 | 0.407160029 | 2.793642962 | 0.005211799 |
| ENSG00000178171 | 1.203369719 | 0.185125721 | 1.985186621 | 0.047123712 |
| ENSG00000174886 | 0.556627875 | -0.58585835 | -2.31880939 | 0.020405374 |
| ENSG00000156261 | 1.461434641 | 0.379418584 | 1.987992875 | 0.046812478 |
| ENSG00000133256 | 0.492864028 | -0.707521949 | -2.510541055 | 0.01205463 |
| ENSG00000173327 | 0.683472194 | -0.380569305 | -1.966410599 | 0.0492512 |
| ENSG00000167286 | 0.63532566 | -0.453617561 | -2.460547993 | 0.013872502 |
| ENSG00000112245 | 1.503930537 | 0.408082039 | 2.032965336 | 0.042056025 |
| ENSG00000239521 | 0.589113891 | -0.529135751 | -2.729240744 | 0.006348034 |
| ENSG00000196449 | 1.445499868 | 0.368455191 | 2.010373057 | 0.04439172 |
| ENSG00000168619 | 1.460408213 | 0.378715995 | 3.13099545 | 0.001742149 |
| ENSG00000127743 | 0.470274352 | -0.754439026 | -2.644786756 | 0.008174241 |
| ENSG00000123810 | 0.51240821 | -0.668633687 | -2.69423635 | 0.007055012 |
| ENSG00000182771 | 0.573894916 | -0.555308973 | -2.071790318 | 0.038285 |
| ENSG00000156873 | 0.637047768 | -0.450910637 | -2.294519328 | 0.021760686 |
| ENSG00000069493 | 0.541649207 | -0.613136708 | -2.775646688 | 0.005509204 |
| ENSG00000126756 | 0.526167873 | -0.642134968 | -2.751140799 | 0.005938811 |
| ENSG00000164123 | 1.356397429 | 0.304832236 | 2.114079821 | 0.03450845 |
| ENSG00000067704 | 1.741104983 | 0.55451996 | 2.715563066 | 0.006616317 |
| ENSG00000099954 | 1.413379019 | 0.345983305 | 2.212688324 | 0.026919141 |
| ENSG00000126264 | 0.684916518 | -0.37845832 | -2.038707878 | 0.041479191 |
| ENSG00000183734 | 0.652323318 | -0.427214953 | -2.029385952 | 0.042418995 |
| ENSG00000168672 | 1.565751723 | 0.448366043 | 2.273897741 | 0.022972136 |
| ENSG00000186187 | 0.57926464 | -0.545995841 | -2.90669296 | 0.003652715 |
| ENSG00000145936 | 0.512728979 | -0.66800788 | -2.396830699 | 0.016537563 |
| ENSG00000065675 | 0.607030841 | -0.499175681 | -2.434902419 | 0.014895806 |
| ENSG00000101974 | 0.660809223 | -0.414290099 | -2.394282547 | 0.016652915 |
| ENSG00000143641 | 1.747002313 | 0.557901355 | 2.798746346 | 0.005130142 |
| ENSG00000187533 | 1.576718742 | 0.455345942 | 3.016017757 | 0.002561183 |
| ENSG00000257017 | 1.411078355 | 0.344354203 | 2.446008005 | 0.014444779 |
| ENSG00000106689 | 0.604933516 | -0.502636718 | -2.137247501 | 0.032577866 |
| ENSG00000048544 | 1.556795986 | 0.442629854 | 2.450593694 | 0.014262084 |
| ENSG00000009335 | 1.555627839 | 0.441879219 | 2.186375376 | 0.028788154 |
| ENSG00000164674 | 0.59746548 | -0.515058771 | -2.576693111 | 0.009975047 |
| ENSG00000008382 | 0.673425022 | -0.395378615 | -1.971177721 | 0.048703551 |
| ENSG00000093010 | 0.656776803 | -0.420411039 | -2.339552436 | 0.019306861 |
| ENSG00000162066 | 0.61168506 | -0.491537737 | -2.353686566 | 0.018588277 |
| ENSG00000213397 | 0.555251041 | -0.588334941 | -2.379103919 | 0.017354783 |
| ENSG00000153989 | 1.971120906 | 0.678602369 | 3.061711089 | 0.002200758 |
| ENSG00000162998 | 0.654506767 | -0.423873354 | -2.024708593 | 0.042897296 |
| ENSG00000198854 | 0.544159956 | -0.608512039 | -1.976538216 | 0.048093852 |
| ENSG00000176076 | 1.340810679 | 0.293274415 | 2.134692509 | 0.032786135 |
| ENSG00000254093 | 0.511053244 | -0.671281498 | -3.129595517 | 0.001750472 |
| ENSG00000179142 | 1.378410993 | 0.320931381 | 2.498049865 | 0.012487863 |
| ENSG00000116329 | 1.22204357 | 0.200524515 | 2.018823265 | 0.043505592 |
| ENSG00000155100 | 1.576709806 | 0.455340274 | 2.373633725 | 0.017614014 |
| ENSG00000182518 | 0.645348929 | -0.437964133 | -2.274197569 | 0.02295411 |
| ENSG00000160185 | 0.567928192 | -0.56576029 | -2.553690409 | 0.010658798 |
| ENSG00000184983 | 0.603940266 | -0.504279983 | -2.693502336 | 0.007070565 |
| ENSG00000184752 | 0.703099816 | -0.352256412 | -1.977016092 | 0.048039811 |
| ENSG00000103522 | 0.590091291 | -0.527478023 | -2.344221582 | 0.01906684 |
| ENSG00000277075 | 0.638283507 | -0.448972726 | -2.291125685 | 0.021956145 |
| ENSG00000257704 | 0.681248786 | -0.383827716 | -1.99702703 | 0.045822247 |
| ENSG00000100028 | 0.638123976 | -0.449222694 | -2.310452344 | 0.020863124 |
| ENSG00000006210 | 0.588609811 | -0.529991775 | -2.998249438 | 0.002715353 |
| ENSG00000150977 | 0.587049038 | -0.532646922 | -2.589722907 | 0.009605321 |
| ENSG00000104331 | 1.532226169 | 0.42672169 | 2.317189548 | 0.020493409 |
| ENSG00000104312 | 1.451418992 | 0.372541693 | 1.990348898 | 0.046552515 |
| ENSG00000160219 | 0.630270582 | -0.461606056 | -2.07157818 | 0.038304797 |
| ENSG00000185728 | 1.606735939 | 0.474204754 | 2.365086258 | 0.018025872 |
| ENSG00000198125 | 0.620629081 | -0.477021668 | -2.097447964 | 0.035953939 |
| ENSG00000248767 | 1.390677158 | 0.329790793 | 3.415112317 | 0.000637557 |
| ENSG00000115042 | 0.563567412 | -0.573468322 | -3.215330929 | 0.001302942 |
| ENSG00000096401 | 1.669006641 | 0.512228624 | 2.876123477 | 0.004025922 |
| ENSG00000181472 | 1.489389179 | 0.398366089 | 1.965493188 | 0.049357183 |
| ENSG00000198443 | 1.469098242 | 0.384648771 | 2.476012549 | 0.013285891 |
| ENSG00000115274 | 0.546597003 | -0.604043489 | -2.591381878 | 0.009559135 |
| ENSG00000267909 | 0.53168231 | -0.63170913 | -2.613815301 | 0.008953743 |
| ENSG00000143761 | 1.648040191 | 0.499586819 | 2.490525176 | 0.012755446 |
| ENSG00000175084 | 0.521207582 | -0.651606887 | -2.476295087 | 0.013275381 |
| ENSG00000147586 | 1.577484871 | 0.455831725 | 2.534754785 | 0.011252606 |
| ENSG00000162729 | 1.560233448 | 0.444835456 | 2.305820134 | 0.021120685 |
| ENSG00000172403 | 0.577614314 | -0.54884891 | -2.054859974 | 0.039892531 |
| ENSG00000196616 | 1.404150462 | 0.339432466 | 2.97210929 | 0.002957614 |
| ENSG00000111906 | 1.410011203 | 0.34359765 | 2.079079359 | 0.037610057 |
| ENSG00000127318 | 1.281878195 | 0.248326342 | 2.373365348 | 0.017626819 |
| ENSG00000273025 | 1.443647053 | 0.367172588 | 3.506008242 | 0.000454881 |
| ENSG00000133392 | 0.592974569 | -0.522603766 | -2.025278151 | 0.042838811 |
| ENSG00000124635 | 0.659771071 | -0.415862366 | -2.193710309 | 0.028256242 |
| ENSG00000166743 | 0.5250234 | -0.644312446 | -2.209449092 | 0.02714342 |
| ENSG00000184897 | 0.699988751 | -0.356691014 | -2.069083066 | 0.038538293 |
| ENSG00000267508 | 1.500450293 | 0.405765258 | 2.991967646 | 0.002771856 |
| ENSG00000183662 | 0.613363837 | -0.488796984 | -2.014535071 | 0.043953387 |
| ENSG00000163157 | 1.240030581 | 0.215136041 | 2.465803509 | 0.01367063 |
| ENSG00000172724 | 0.647120698 | -0.435222452 | -2.101899846 | 0.03556205 |
| ENSG00000124203 | 0.487309621 | -0.718855586 | -2.059262611 | 0.039469088 |
| ENSG00000186204 | 0.679451843 | -0.38646892 | -1.99531303 | 0.04600875 |
| ENSG00000163599 | 0.611511754 | -0.491821102 | -2.428961605 | 0.015142136 |
| ENSG00000072682 | 1.945144345 | 0.665336188 | 3.384634959 | 0.00071273 |
| ENSG00000035664 | 0.582613748 | -0.540230838 | -2.579863037 | 0.009883951 |
| ENSG00000240583 | 0.636175317 | -0.452281099 | -2.00788752 | 0.044655246 |
| ENSG00000171570 | 0.609211463 | -0.495589842 | -1.987285915 | 0.046890722 |
| ENSG00000214694 | 0.621302113 | -0.47593782 | -2.222712893 | 0.026235166 |
| ENSG00000011007 | 1.598856131 | 0.469288455 | 2.434956883 | 0.014893564 |
| ENSG00000131196 | 0.63039618 | -0.461406801 | -2.327080415 | 0.019960986 |
| ENSG00000120963 | 1.484316514 | 0.394954406 | 2.21621442 | 0.026676821 |
| ENSG00000160856 | 0.585095005 | -0.535981044 | -1.972917001 | 0.048505019 |
| ENSG00000153294 | 1.546426857 | 0.435947016 | 2.194995981 | 0.028163886 |
| ENSG00000178226 | 0.361962911 | -1.016213528 | -3.158469187 | 0.001586001 |
| ENSG00000116906 | 1.659276393 | 0.5063816 | 3.164631944 | 0.001552792 |
| ENSG00000104889 | 0.595553168 | -0.518264612 | -2.818697342 | 0.004821896 |
| ENSG00000130332 | 0.642338994 | -0.442639087 | -2.235572744 | 0.025379772 |
| ENSG00000273217 | 1.495096852 | 0.402190989 | 3.43621805 | 0.000589896 |
| ENSG00000054356 | 1.403253858 | 0.338793724 | 2.645144833 | 0.008165596 |
| ENSG00000188282 | 0.582421813 | -0.540560329 | -2.127595855 | 0.033370606 |
| ENSG00000105136 | 1.411168071 | 0.34441778 | 2.003266313 | 0.045148711 |
| ENSG00000254647 | 1.273838846 | 0.242035055 | 2.941158679 | 0.00326987 |
| ENSG00000099331 | 0.602583473 | -0.50652908 | -2.654754064 | 0.007936625 |
| ENSG00000173366 | 1.370979774 | 0.315525648 | 2.125770547 | 0.03352237 |
| ENSG00000103415 | 0.659874582 | -0.415705489 | -2.09469979 | 0.036197688 |
| ENSG00000105647 | 0.455521902 | -0.78631148 | -2.484052428 | 0.012989668 |
| ENSG00000122877 | 0.673558022 | -0.395181138 | -2.078803907 | 0.037635378 |
| ENSG00000204740 | 1.405470596 | 0.34037219 | 2.625503246 | 0.008652098 |
| ENSG00000102977 | 0.662152049 | -0.412260068 | -2.287094723 | 0.022190295 |
| ENSG00000196843 | 0.492794385 | -0.70766326 | -3.502864269 | 0.000460284 |
| ENSG00000274897 | 0.565977391 | -0.569201147 | -2.473310962 | 0.013386761 |
| ENSG00000147364 | 0.606875731 | -0.499431236 | -3.128100882 | 0.001759398 |
| ENSG00000146409 | 1.462612026 | 0.380223896 | 2.073665944 | 0.038110346 |
| ENSG00000102144 | 1.455991935 | 0.375687411 | 1.983740429 | 0.047284784 |
| ENSG00000132872 | 1.221810882 | 0.200334087 | 2.229852826 | 0.025757215 |
| ENSG00000180900 | 1.787534911 | 0.580837526 | 3.207673168 | 0.001338135 |
| ENSG00000188958 | 0.639106703 | -0.447683854 | -1.967712032 | 0.049101181 |
| ENSG00000217555 | 0.615795439 | -0.484840449 | -2.175424079 | 0.029598352 |
| ENSG00000124571 | 1.559544257 | 0.444393636 | 2.254295717 | 0.024177571 |
| ENSG00000120896 | 0.556914299 | -0.585343912 | -3.43002481 | 0.000603526 |
| ENSG00000187860 | 0.624557785 | -0.470711423 | -1.975201617 | 0.048245273 |
| ENSG00000117091 | 0.653517177 | -0.425386462 | -2.169093012 | 0.030075623 |
| ENSG00000239839 | 1.377819717 | 0.320502335 | 2.542539569 | 0.011005014 |
| ENSG00000204174 | 1.849699738 | 0.615023322 | 2.275813093 | 0.022857199 |
| ENSG00000169429 | 1.700632677 | 0.531000345 | 3.021918474 | 0.002511782 |
| ENSG00000162241 | 0.612350633 | -0.490450231 | -2.237000955 | 0.025286278 |
| ENSG00000184436 | 0.580990012 | -0.543021713 | -2.839688978 | 0.004515754 |
| ENSG00000177700 | 0.660798442 | -0.414306414 | -2.04661214 | 0.040696182 |
| ENSG00000214706 | 1.447610706 | 0.369914408 | 2.018922486 | 0.043495277 |
| ENSG00000138650 | 1.265813646 | 0.235715114 | 2.645346052 | 0.008160741 |
| ENSG00000112041 | 0.572155464 | -0.558344534 | -2.119255986 | 0.034068839 |
| ENSG00000120094 | 0.609776475 | -0.494662823 | -2.007815488 | 0.044662902 |
| ENSG00000132874 | 1.443729514 | 0.367229706 | 2.965607114 | 0.003020861 |
| ENSG00000182798 | 1.286889257 | 0.252227878 | 2.409697641 | 0.015965746 |
| ENSG00000112335 | 1.771147018 | 0.571627369 | 2.924519977 | 0.003449879 |
| ENSG00000205220 | 0.729052702 | -0.316009256 | -2.015322938 | 0.043870823 |
| ENSG00000134538 | 1.255513611 | 0.227544741 | 2.271381866 | 0.023123871 |
| ENSG00000110066 | 1.422203601 | 0.3522075 | 2.02515735 | 0.04285121 |
| ENSG00000075790 | 1.476100917 | 0.389404096 | 2.155810175 | 0.031098491 |
| ENSG00000171956 | 1.30699542 | 0.267730931 | 2.188999208 | 0.028596898 |
| ENSG00000134812 | 1.484401804 | 0.395011866 | 3.319232342 | 0.000902653 |
| ENSG00000153779 | 1.264386307 | 0.234586872 | 2.225398023 | 0.02605453 |
| ENSG00000054611 | 0.695285002 | -0.363433443 | -2.264975571 | 0.023514179 |
| ENSG00000176476 | 0.637205989 | -0.450662302 | -2.509325377 | 0.012096201 |
| ENSG00000089012 | 0.65064435 | -0.4297921 | -2.109195378 | 0.034927721 |
| ENSG00000184923 | 1.495648659 | 0.402559999 | 2.090355258 | 0.036585899 |
| ENSG00000267881 | 1.414150903 | 0.346529282 | 2.15488335 | 0.031170964 |
| ENSG00000074410 | 1.592411357 | 0.465249444 | 2.365866901 | 0.01798791 |
| ENSG00000170248 | 1.488194969 | 0.397563955 | 2.073939399 | 0.038084939 |
| ENSG00000273983 | 0.613378823 | -0.488772552 | -2.305535866 | 0.02113658 |
| ENSG00000170142 | 1.485010691 | 0.395421972 | 2.131408297 | 0.03305552 |
| ENSG00000143771 | 1.430146342 | 0.357776776 | 1.971749376 | 0.048638224 |
| ENSG00000104731 | 0.663137749 | -0.410772544 | -2.372735077 | 0.017656923 |
| ENSG00000099992 | 0.640478566 | -0.445539623 | -2.387041971 | 0.016984552 |
| ENSG00000178078 | 0.579231477 | -0.546053093 | -2.987117456 | 0.002816215 |
| ENSG00000119913 | 1.422413959 | 0.3523554 | 2.675748364 | 0.00745626 |
| ENSG00000186074 | 0.616054894 | -0.484419206 | -2.234464536 | 0.025452524 |
| ENSG00000173762 | 0.669099924 | -0.401821867 | -2.180779097 | 0.029199759 |
| ENSG00000103365 | 0.625585684 | -0.469066974 | -2.442621066 | 0.014581038 |
| ENSG00000105198 | 1.326867195 | 0.282820671 | 2.088717455 | 0.036733165 |
| ENSG00000078589 | 0.60291117 | -0.505985406 | -2.179814588 | 0.029271208 |
| ENSG00000255833 | 0.490848866 | -0.711619008 | -2.350985322 | 0.018723772 |
| ENSG00000123144 | 0.526957659 | -0.640635077 | -2.703968632 | 0.006851676 |
| ENSG00000106089 | 1.395350121 | 0.333145367 | 2.526728453 | 0.011513048 |
| ENSG00000229833 | 0.589831746 | -0.52791796 | -2.321128984 | 0.020279884 |
| ENSG00000125245 | 0.615531437 | -0.485269259 | -1.983922441 | 0.047264487 |
| ENSG00000161551 | 1.486972091 | 0.396741899 | 2.252589184 | 0.024285064 |
| ENSG00000147642 | 1.403216519 | 0.338767115 | 2.022734386 | 0.04310054 |
| ENSG00000007202 | 1.475419741 | 0.388942519 | 1.989754511 | 0.046617985 |
| ENSG00000179399 | 1.477822492 | 0.390569715 | 3.527219583 | 0.000419948 |
| ENSG00000124134 | 0.695572595 | -0.363019895 | -2.080760905 | 0.037455796 |
| ENSG00000275774 | 0.378982688 | -0.970264752 | -2.293791828 | 0.021802459 |
| ENSG00000146731 | 1.821424908 | 0.599619111 | 3.102079256 | 0.001921665 |
| ENSG00000104375 | 1.521662344 | 0.419803384 | 2.305271799 | 0.021151356 |
| ENSG00000183878 | 1.320993369 | 0.278384006 | 2.859344506 | 0.004245175 |
| ENSG00000075035 | 0.259444552 | -1.349212273 | -2.167230068 | 0.030217316 |
| ENSG00000107404 | 1.38162564 | 0.323260806 | 2.049895034 | 0.040374675 |
| ENSG00000117090 | 0.589721011 | -0.528105717 | -2.330319651 | 0.019789263 |
| ENSG00000117020 | 0.659139631 | -0.416819883 | -2.075037752 | 0.037983036 |
| ENSG00000186153 | 0.516564479 | -0.66055516 | -2.905065842 | 0.003671759 |
| ENSG00000104951 | 0.693334033 | -0.366243386 | -2.023329992 | 0.043039137 |
| ENSG00000111364 | 1.464744165 | 0.381680596 | 1.99099635 | 0.046481289 |
| ENSG00000123561 | 1.503984342 | 0.408117815 | 3.18476562 | 0.001448713 |
| ENSG00000186010 | 0.378739205 | -0.970907423 | -2.921634263 | 0.003482002 |
| ENSG00000102531 | 1.430909048 | 0.35830994 | 2.099770447 | 0.035749039 |
| ENSG00000274049 | 0.566351467 | -0.568540426 | -2.256908683 | 0.024013781 |
| ENSG00000212907 | 1.846863767 | 0.613488939 | 2.51266163 | 0.01198242 |
| ENSG00000189007 | 1.607111763 | 0.474438632 | 2.886439724 | 0.003896274 |
| ENSG00000016082 | 0.609704739 | -0.494780473 | -2.205388721 | 0.027426829 |
| ENSG00000008282 | 1.440947739 | 0.365301049 | 1.988370068 | 0.046770777 |
| ENSG00000268173 | 0.537158172 | -0.621462681 | -2.080416755 | 0.037487324 |
| ENSG00000164951 | 1.490377447 | 0.399029408 | 2.014138292 | 0.043995016 |
| ENSG00000143627 | 1.354422375 | 0.303375072 | 2.293859008 | 0.021798599 |
| ENSG00000163959 | 0.606514382 | -0.500026837 | -2.232736345 | 0.025566336 |
| ENSG00000104497 | 1.722065747 | 0.543524586 | 2.515856483 | 0.011874352 |
| ENSG00000177989 | 0.697069771 | -0.360869771 | -2.015230573 | 0.043880496 |
| ENSG00000117245 | 0.564230183 | -0.572292984 | -2.214239624 | 0.026812299 |
| ENSG00000121351 | 1.189183199 | 0.173266684 | 2.016723407 | 0.043724386 |
| ENSG00000148290 | 0.672702815 | -0.39645163 | -2.19410133 | 0.028228126 |
| ENSG00000122694 | 0.577791084 | -0.548542922 | -2.631477464 | 0.008501451 |
| ENSG00000015133 | 0.72052223 | -0.327779011 | -2.030294212 | 0.042326642 |
| ENSG00000178795 | 1.384185708 | 0.32511203 | 3.219919058 | 0.001282268 |
| ENSG00000166450 | 1.263172079 | 0.23362608 | 2.092594898 | 0.036385332 |
| ENSG00000159208 | 0.674633112 | -0.393586274 | -2.109015116 | 0.034943277 |
| ENSG00000204007 | 1.472298714 | 0.386824931 | 3.696985142 | 0.000218175 |
| ENSG00000155034 | 1.399866284 | 0.336376721 | 2.017800526 | 0.04361204 |
| ENSG00000170881 | 1.76759214 | 0.569618248 | 2.909769293 | 0.003616956 |
| ENSG00000197487 | 1.19209455 | 0.175711886 | 2.078836562 | 0.037632375 |
| ENSG00000203756 | 0.557081229 | -0.585044217 | -2.076082538 | 0.037886318 |
| ENSG00000184144 | 1.267686786 | 0.237193811 | 2.314080894 | 0.020663285 |
| ENSG00000166002 | 0.693194439 | -0.366444743 | -2.032487579 | 0.04210432 |
| ENSG00000105298 | 0.666910387 | -0.405099594 | -2.111154218 | 0.034759058 |
| ENSG00000163421 | 1.682368397 | 0.520202561 | 4.376242475 | 1.21E-05 |
| ENSG00000196724 | 1.28712571 | 0.2524116 | 2.848789922 | 0.004388585 |
| ENSG00000141449 | 1.380502731 | 0.32244773 | 2.044164403 | 0.040937309 |
| ENSG00000128394 | 0.550356241 | -0.5971895 | -2.956379817 | 0.003112735 |
| ENSG00000159224 | 1.41934225 | 0.35019356 | 3.094694728 | 0.001970156 |
| ENSG00000182348 | 1.215459438 | 0.195122144 | 1.964163712 | 0.04951111 |
| ENSG00000275691 | 1.411721505 | 0.344809885 | 2.664762135 | 0.00770428 |
| ENSG00000161180 | 0.576363922 | -0.551016009 | -2.515975755 | 0.011870335 |
| ENSG00000196417 | 1.465472891 | 0.382177983 | 2.663851764 | 0.00772516 |
| ENSG00000166796 | 0.652313053 | -0.427230689 | -2.191128378 | 0.028442504 |
| ENSG00000101445 | 0.662905046 | -0.411123517 | -2.011077664 | 0.044317254 |
| ENSG00000128313 | 1.28179092 | 0.248258257 | 2.014249892 | 0.043983304 |
| ENSG00000102103 | 0.543870767 | -0.609043621 | -2.824160705 | 0.004740461 |
| ENSG00000140993 | 0.566104185 | -0.568977146 | -2.622634166 | 0.008725291 |
| ENSG00000100024 | 0.539276083 | -0.617527627 | -2.019282294 | 0.043457887 |
| ENSG00000112297 | 1.618824496 | 0.481700266 | 2.291736525 | 0.021920851 |
| ENSG00000164933 | 1.466368462 | 0.38278891 | 2.180349481 | 0.029231566 |
| ENSG00000147081 | 1.504748252 | 0.40862561 | 3.481516159 | 0.000498584 |
| ENSG00000176893 | 1.428979499 | 0.356960552 | 3.017313497 | 0.002550259 |
| ENSG00000154760 | 0.677505605 | -0.389337453 | -2.106707766 | 0.035142919 |
| ENSG00000235453 | 0.671824822 | -0.397757654 | -2.09496368 | 0.036174221 |
| ENSG00000104938 | 1.479909538 | 0.391980963 | 2.485319805 | 0.01294351 |
| ENSG00000188483 | 1.508556913 | 0.411153507 | 2.348096357 | 0.018869639 |
| ENSG00000276180 | 0.662819024 | -0.411253292 | -2.143030301 | 0.032110665 |
| ENSG00000159714 | 0.698739647 | -0.358477072 | -1.976716706 | 0.048073661 |
| ENSG00000108599 | 1.554199692 | 0.440960746 | 2.32309537 | 0.02017403 |
| ENSG00000145107 | 1.404625781 | 0.339770919 | 2.002763544 | 0.045202675 |
| ENSG00000196605 | 0.574159468 | -0.554848102 | -2.819556845 | 0.004809001 |
| ENSG00000118785 | 1.774771292 | 0.573671565 | 3.034747326 | 0.002407373 |
| ENSG00000079689 | 1.341516972 | 0.293801043 | 2.452881857 | 0.014171687 |
| ENSG00000104814 | 0.593759479 | -0.52128096 | -2.45569904 | 0.014061086 |
| ENSG00000116824 | 0.648004524 | -0.433857602 | -2.425376238 | 0.015292529 |
| ENSG00000142182 | 1.394773307 | 0.332731898 | 3.46860408 | 0.00052317 |
| ENSG00000157017 | 0.609365955 | -0.49533628 | -2.029757586 | 0.042381186 |
| ENSG00000146476 | 1.855016023 | 0.617893334 | 3.103080575 | 0.001915175 |
| ENSG00000132170 | 1.363074084 | 0.309742505 | 2.000219624 | 0.045476554 |
| ENSG00000001497 | 0.652783537 | -0.426509695 | -2.125212011 | 0.033568926 |
| ENSG00000185130 | 0.652540414 | -0.426882205 | -2.082088762 | 0.037334363 |
| ENSG00000101782 | 1.60703158 | 0.474388738 | 2.340350428 | 0.019265654 |
| ENSG00000213339 | 0.611221918 | -0.492295181 | -2.357516149 | 0.018397655 |
| ENSG00000167077 | 0.672167075 | -0.397248346 | -2.008262889 | 0.044615363 |
| ENSG00000104388 | 1.606245507 | 0.473899472 | 2.675784458 | 0.007455458 |
| ENSG00000096063 | 1.501301032 | 0.406332087 | 1.964906575 | 0.049425052 |
| ENSG00000267001 | 1.27960089 | 0.246548225 | 2.754084272 | 0.005885661 |
| ENSG00000164941 | 1.740848154 | 0.55437244 | 3.033422563 | 0.002417968 |
| ENSG00000132554 | 1.255765733 | 0.227745532 | 2.214826161 | 0.026771999 |
| ENSG00000036828 | 1.258339719 | 0.229793169 | 2.477367538 | 0.013235553 |
| ENSG00000183484 | 0.663924734 | -0.409586488 | -2.065718315 | 0.038855085 |
| ENSG00000108176 | 1.347667673 | 0.298375448 | 1.996334444 | 0.045897531 |
| ENSG00000119650 | 0.669050831 | -0.401895242 | -2.045777523 | 0.040778264 |
| ENSG00000177888 | 1.626989045 | 0.486731095 | 2.418968943 | 0.015564569 |
| ENSG00000213523 | 0.672996485 | -0.396015172 | -2.096168181 | 0.036067274 |
| ENSG00000143105 | 1.392173077 | 0.330865891 | 2.735332044 | 0.006231738 |
| ENSG00000116957 | 1.50703567 | 0.410144589 | 2.268670651 | 0.023288362 |
| ENSG00000152467 | 1.219622677 | 0.19854153 | 2.165442047 | 0.030353849 |
| ENSG00000038295 | 1.317316615 | 0.2755968 | 2.042966781 | 0.041055727 |
| ENSG00000099899 | 0.643236225 | -0.441243243 | -2.494361563 | 0.012618394 |
| ENSG00000222028 | 1.248726425 | 0.222124172 | 2.57754165 | 0.009950589 |
| ENSG00000106608 | 1.528074966 | 0.424008751 | 2.112385876 | 0.034653365 |
| ENSG00000168961 | 0.526956293 | -0.640637669 | -3.351193343 | 0.000804641 |
| ENSG00000164830 | 1.683928037 | 0.521129181 | 2.462976217 | 0.013778906 |
| ENSG00000105058 | 0.659433699 | -0.416373844 | -2.543073198 | 0.010988221 |
| ENSG00000101448 | 1.304959065 | 0.266171672 | 2.715990126 | 0.006607789 |
| ENSG00000135801 | 1.768693968 | 0.570241403 | 2.628276807 | 0.008581865 |
| ENSG00000132016 | 0.61721072 | -0.482544789 | -2.722120376 | 0.006486451 |
| ENSG00000111859 | 0.608803917 | -0.496259038 | -2.327902548 | 0.019917279 |
| ENSG00000131174 | 0.645787593 | -0.437284633 | -2.030845145 | 0.042270706 |
| ENSG00000092758 | 1.320744624 | 0.278195687 | 1.998523218 | 0.045659965 |
| ENSG00000204482 | 0.641682851 | -0.443661099 | -2.326122459 | 0.020012019 |
| ENSG00000185291 | 0.58716194 | -0.532454619 | -2.589240468 | 0.00961879 |
| ENSG00000165061 | 1.25027985 | 0.223367407 | 2.554013945 | 0.010648899 |
| ENSG00000225697 | 1.388025975 | 0.327882576 | 2.084557954 | 0.037109444 |
| ENSG00000185838 | 0.526354411 | -0.641780507 | -2.724035757 | 0.006448952 |
| ENSG00000183463 | 1.485308219 | 0.395622306 | 3.369168843 | 0.000753952 |
| ENSG00000125538 | 1.401462012 | 0.337515986 | 2.24234746 | 0.024938925 |
| ENSG00000169955 | 0.69210039 | -0.368024262 | -2.111382919 | 0.034739412 |
| ENSG00000130165 | 0.540389528 | -0.615465051 | -3.118413721 | 0.001818274 |
| ENSG00000186810 | 0.663840719 | -0.409713039 | -2.047308001 | 0.040627853 |
| ENSG00000265818 | 1.288091751 | 0.253161861 | 2.221897046 | 0.026290264 |
| ENSG00000173264 | 0.632977085 | -0.457321058 | -2.368790862 | 0.017846342 |
| ENSG00000112212 | 1.369353125 | 0.314338457 | 2.04342429 | 0.041010455 |
| ENSG00000011201 | 0.500061279 | -0.693024629 | -2.767835004 | 0.005643002 |
| ENSG00000185236 | 0.689305028 | -0.372071395 | -2.057936461 | 0.039596233 |
| ENSG00000139914 | 0.655305542 | -0.422653676 | -1.994364989 | 0.046112182 |
| ENSG00000215375 | 0.624492849 | -0.4708154 | -2.297890034 | 0.021568049 |
| ENSG00000111679 | 0.666234943 | -0.406112904 | -2.150940895 | 0.031480865 |
| ENSG00000104907 | 0.647353911 | -0.43486213 | -2.227966262 | 0.025882765 |
| ENSG00000197275 | 1.563705433 | 0.447058282 | 3.602161044 | 0.000315583 |
| ENSG00000197540 | 0.600074975 | -0.510700674 | -2.37537875 | 0.017530951 |
| ENSG00000158604 | 1.415725513 | 0.34764213 | 1.985251908 | 0.047116452 |
| ENSG00000198225 | 0.600002919 | -0.510820759 | -2.119714013 | 0.034030171 |
| ENSG00000275553 | 1.33094918 | 0.285892357 | 3.089666748 | 0.002003812 |
| ENSG00000172183 | 0.583076705 | -0.539436532 | -2.659358133 | 0.007828969 |
| ENSG00000197872 | 0.627500676 | -0.466010531 | -2.229364373 | 0.025789671 |
| ENSG00000184227 | 0.665193725 | -0.407676966 | -2.197164875 | 0.028008673 |
| ENSG00000267952 | 1.48134054 | 0.392947448 | 2.434571159 | 0.014909448 |
| ENSG00000198842 | 1.413265055 | 0.345902669 | 3.411836239 | 0.000645269 |
| ENSG00000273079 | 1.492035944 | 0.400141593 | 3.207414812 | 0.001339337 |
| ENSG00000167523 | 0.609527471 | -0.49507126 | -2.359668219 | 0.018291286 |
| ENSG00000135426 | 0.589782121 | -0.528002096 | -2.353522035 | 0.018596506 |
| ENSG00000048740 | 0.650893771 | -0.429408829 | -2.059269619 | 0.039468417 |
| ENSG00000183751 | 0.693038278 | -0.366670046 | -2.010139529 | 0.044416423 |
| ENSG00000184814 | 1.257870306 | 0.229420058 | 2.095524344 | 0.036124407 |
| ENSG00000173992 | 0.667692289 | -0.403927857 | -2.00514803 | 0.044947224 |
| ENSG00000167118 | 0.668726646 | -0.402379903 | -2.169282035 | 0.030061278 |
| ENSG00000096088 | 1.247384117 | 0.221048652 | 2.301713715 | 0.021351322 |
| ENSG00000120910 | 0.676413585 | -0.390950578 | -2.299716757 | 0.021464272 |
| ENSG00000243667 | 0.658090373 | -0.418413012 | -2.075903789 | 0.03790285 |
| ENSG00000129038 | 0.646827877 | -0.435675053 | -2.183985312 | 0.028963327 |
| ENSG00000169020 | 0.631984911 | -0.45888976 | -2.26778148 | 0.023342529 |
| ENSG00000213762 | 1.391820435 | 0.330612556 | 2.028215697 | 0.042538239 |
| ENSG00000130706 | 0.683483016 | -0.380553471 | -1.98935617 | 0.046661904 |
| ENSG00000104408 | 1.492020019 | 0.400130919 | 2.350169573 | 0.01876486 |
| ENSG00000042304 | 1.346071548 | 0.297190385 | 2.422721966 | 0.015404712 |
| ENSG00000164898 | 0.621166241 | -0.476156535 | -2.32615407 | 0.020010333 |
| ENSG00000278599 | 1.448120003 | 0.370266165 | 2.270809194 | 0.023158531 |
| ENSG00000129158 | 0.559372678 | -0.580939341 | -2.596060099 | 0.009429957 |
| ENSG00000167895 | 0.597175325 | -0.515544531 | -2.558188387 | 0.010521907 |
| ENSG00000259494 | 0.639740732 | -0.446692291 | -2.095642736 | 0.036113895 |
| ENSG00000144747 | 1.468874613 | 0.384496538 | 2.074949067 | 0.037991255 |
| ENSG00000107959 | 1.548435081 | 0.437244796 | 2.591356264 | 0.009559847 |
| ENSG00000258405 | 1.414911957 | 0.347067308 | 3.348742668 | 0.000811792 |
| ENSG00000176925 | 1.352736081 | 0.302129268 | 2.640355216 | 0.008281917 |
| ENSG00000132669 | 1.805196914 | 0.59066968 | 3.097431699 | 0.001952054 |
| ENSG00000128408 | 0.631108976 | -0.460276727 | -2.487880883 | 0.012850677 |
| ENSG00000130813 | 0.703887211 | -0.351137147 | -2.121923628 | 0.033844152 |
| ENSG00000224960 | 1.330308534 | 0.285410896 | 2.915661211 | 0.003549357 |
| ENSG00000206535 | 0.644638995 | -0.439064817 | -2.030955398 | 0.042259519 |
| ENSG00000129103 | 1.523159752 | 0.420786962 | 2.26581297 | 0.023462837 |
| ENSG00000110911 | 1.435069932 | 0.361213581 | 2.20911688 | 0.027166512 |
| ENSG00000064961 | 0.64190239 | -0.443319028 | -2.426792139 | 0.015232981 |
| ENSG00000206422 | 1.256945226 | 0.228684354 | 2.694256277 | 0.00705459 |
| ENSG00000131669 | 0.638849101 | -0.448087001 | -2.075549234 | 0.037935661 |
| ENSG00000104412 | 1.803113946 | 0.58951514 | 2.905751085 | 0.003663728 |
| ENSG00000178773 | 0.652848955 | -0.426409486 | -2.079791037 | 0.037544704 |
| ENSG00000070756 | 1.49030972 | 0.398983964 | 2.302412105 | 0.021311943 |
| ENSG00000146223 | 1.886862911 | 0.634915614 | 3.283152703 | 0.00102653 |
| ENSG00000130311 | 0.596951855 | -0.515918813 | -2.825431883 | 0.004721693 |
| ENSG00000147649 | 2.018446105 | 0.70232796 | 3.247143914 | 0.001165694 |
| ENSG00000198223 | 0.622804891 | -0.473521986 | -2.391111379 | 0.016797456 |
| ENSG00000151834 | 1.509132542 | 0.41153501 | 3.449765773 | 0.000561073 |
| ENSG00000266472 | 0.748642857 | -0.289493236 | -2.073117092 | 0.038161384 |
| ENSG00000025796 | 1.963125562 | 0.674537878 | 3.299189282 | 0.000969645 |
| ENSG00000164091 | 1.526084034 | 0.422704999 | 1.961952898 | 0.049767968 |
| ENSG00000197128 | 1.409034478 | 0.342904703 | 2.131005411 | 0.033088696 |
| ENSG00000134594 | 0.519296055 | -0.655281125 | -2.601877697 | 0.009271491 |
| ENSG00000170684 | 0.662841111 | -0.41121997 | -2.107954647 | 0.035034913 |
| ENSG00000114480 | 1.636831444 | 0.492762327 | 2.453776725 | 0.014136472 |
| ENSG00000198363 | 1.819212319 | 0.598403616 | 3.189265972 | 0.001426346 |
| ENSG00000079950 | 1.486850547 | 0.396660156 | 2.567912684 | 0.010231292 |
| ENSG00000250641 | 1.415980288 | 0.347822074 | 2.857784453 | 0.004266101 |
| ENSG00000275969 | 1.495418041 | 0.402405794 | 3.485105846 | 0.000491942 |
| ENSG00000105671 | 0.492775852 | -0.70770087 | -3.049801726 | 0.002289925 |
| ENSG00000167476 | 0.510412602 | -0.672535857 | -2.249100903 | 0.024506077 |
| ENSG00000188676 | 0.152907131 | -1.877924528 | -2.631463249 | 0.008501806 |
| ENSG00000159685 | 0.540677582 | -0.614932144 | -2.846518965 | 0.00442001 |
| ENSG00000117215 | 0.550752301 | -0.596470116 | -2.110737838 | 0.034794852 |
| ENSG00000088320 | 0.612969703 | -0.489439768 | -2.105218911 | 0.035272257 |
| ENSG00000052802 | 1.503411224 | 0.407736675 | 2.358326697 | 0.018357529 |
| ENSG00000145526 | 1.392242018 | 0.33091541 | 2.914206303 | 0.003565942 |
| ENSG00000111199 | 0.603276248 | -0.505380064 | -2.559870859 | 0.010471107 |
| ENSG00000185730 | 1.973737202 | 0.679928802 | 3.734920178 | 0.000187775 |
| ENSG00000257529 | 0.616464143 | -0.48375512 | -2.000391345 | 0.045458022 |
| ENSG00000119673 | 0.681997998 | -0.382728557 | -2.216407691 | 0.026663593 |
| ENSG00000177548 | 0.634841202 | -0.454380386 | -2.567883137 | 0.010232164 |
| ENSG00000255298 | 4.042754312 | 1.39692622 | 2.042136391 | 0.041138004 |
| ENSG00000024048 | 1.498681426 | 0.404585672 | 2.147436377 | 0.031758557 |
| ENSG00000113522 | 1.441399175 | 0.365614291 | 2.060474759 | 0.039353176 |
| ENSG00000168438 | 1.69419952 | 0.52721037 | 2.386391396 | 0.017014632 |
| ENSG00000126010 | 1.365737019 | 0.311694223 | 3.38937595 | 0.000700519 |
| ENSG00000116191 | 1.445987773 | 0.368792668 | 2.001177733 | 0.04537324 |
| ENSG00000067829 | 0.6401143 | -0.446108524 | -2.271215387 | 0.023133942 |
| ENSG00000115263 | 1.33700209 | 0.290429862 | 3.31608675 | 0.000912875 |
| ENSG00000127580 | 0.627809916 | -0.46551784 | -2.445891989 | 0.014449428 |
| ENSG00000078369 | 1.512798193 | 0.413961044 | 2.10225166 | 0.035531237 |
| ENSG00000085741 | 1.512825031 | 0.413978784 | 2.49669943 | 0.012535516 |
| ENSG00000180398 | 1.485930683 | 0.396041298 | 2.194468736 | 0.028201729 |
| ENSG00000011426 | 1.623154737 | 0.484371624 | 2.326282197 | 0.020003501 |
| ENSG00000110876 | 0.675605211 | -0.39214638 | -2.212565021 | 0.026927649 |
| ENSG00000123124 | 1.487271001 | 0.396942898 | 1.971418596 | 0.048676016 |
| ENSG00000147679 | 1.594413262 | 0.466505808 | 2.509803052 | 0.012079851 |
| ENSG00000180596 | 0.666091717 | -0.406327904 | -2.063106455 | 0.039102515 |
| ENSG00000147799 | 1.391662923 | 0.330499379 | 2.049371418 | 0.04042581 |
| ENSG00000257411 | 1.404908116 | 0.339971903 | 2.873315837 | 0.004061878 |
| ENSG00000267179 | 0.54486959 | -0.607208797 | -2.641336351 | 0.008257969 |
| ENSG00000239961 | 0.548210124 | -0.601096628 | -2.191777711 | 0.028395561 |
| ENSG00000136982 | 1.47778988 | 0.390547647 | 1.99022713 | 0.046565921 |
| ENSG00000164588 | 1.537245105 | 0.429991922 | 3.940550485 | 8.13E-05 |
| ENSG00000230561 | 1.46105865 | 0.379161275 | 2.51132939 | 0.012027741 |
| ENSG00000131143 | 0.529187484 | -0.636412498 | -2.984739122 | 0.002838203 |
| ENSG00000128274 | 0.672302937 | -0.39704624 | -2.106408575 | 0.035168877 |
| ENSG00000127951 | 0.663588136 | -0.410093599 | -2.146110368 | 0.031864174 |
| ENSG00000162757 | 1.41070937 | 0.344092677 | 2.186125182 | 0.028806448 |
| ENSG00000188038 | 1.44189551 | 0.365958575 | 2.22858484 | 0.025841541 |
| ENSG00000241186 | 1.350650864 | 0.300586598 | 2.573498702 | 0.010067602 |
| ENSG00000140691 | 0.525713393 | -0.642999095 | -2.891512678 | 0.003833921 |
| ENSG00000104381 | 1.476018957 | 0.389348569 | 2.069698686 | 0.03848057 |
| ENSG00000122218 | 1.6875276 | 0.523264499 | 2.211643989 | 0.026991273 |
| ENSG00000197056 | 1.477397912 | 0.390282373 | 2.048526562 | 0.040508432 |
| ENSG00000196228 | 1.297821257 | 0.260686902 | 2.204930797 | 0.027458951 |
| ENSG00000123136 | 0.657565196 | -0.419211363 | -2.300287972 | 0.021431911 |
| ENSG00000165156 | 1.545867582 | 0.435585294 | 2.154928987 | 0.031167392 |
| ENSG00000171522 | 0.595120533 | -0.518991318 | -2.311517968 | 0.020804262 |
| ENSG00000171649 | 1.340543199 | 0.293074904 | 2.067722173 | 0.038666156 |
| ENSG00000141985 | 0.638422904 | -0.448754356 | -2.669553949 | 0.007595207 |
| ENSG00000173218 | 1.457084819 | 0.376437741 | 2.16385049 | 0.030475826 |
| ENSG00000214686 | 1.424691673 | 0.35395542 | 3.729554952 | 0.000191818 |
| ENSG00000243811 | 0.597221061 | -0.515467948 | -2.742523335 | 0.006096912 |
| ENSG00000070010 | 0.63028871 | -0.461577295 | -2.50041094 | 0.012404932 |
| ENSG00000116005 | 1.513706298 | 0.414561146 | 2.182010978 | 0.029108723 |
| ENSG00000125352 | 0.679119743 | -0.386957815 | -2.036140917 | 0.041736207 |
| ENSG00000173612 | 1.518966023 | 0.418029855 | 3.504904684 | 0.000456771 |
| ENSG00000007541 | 0.666608016 | -0.405553088 | -2.062456739 | 0.039164272 |
| ENSG00000117500 | 1.462574025 | 0.380197914 | 2.12778407 | 0.033354991 |
| ENSG00000269404 | 0.359807197 | -1.022186955 | -2.330257027 | 0.019792571 |
| ENSG00000130176 | 0.58993688 | -0.527739731 | -2.152844402 | 0.031330909 |
| ENSG00000126759 | 0.594668858 | -0.51975057 | -2.273479629 | 0.022997292 |
| ENSG00000166220 | 1.245106796 | 0.219221306 | 2.460783039 | 0.013863417 |
| ENSG00000187140 | 0.640425796 | -0.445622018 | -2.125369039 | 0.033555832 |
| ENSG00000130755 | 0.687065109 | -0.375326218 | -1.996248447 | 0.045906886 |
| ENSG00000125970 | 0.651565635 | -0.428377143 | -2.058903991 | 0.039503437 |
| ENSG00000184811 | 1.341333961 | 0.293664612 | 3.154993901 | 0.001605015 |
| ENSG00000175161 | 1.311501952 | 0.271173009 | 3.348887743 | 0.000811367 |
| ENSG00000108256 | 1.557311119 | 0.442960693 | 2.21008665 | 0.027099149 |
| ENSG00000124882 | 1.530490292 | 0.425588137 | 3.322069311 | 0.000893525 |
| ENSG00000173198 | 0.497657144 | -0.697843905 | -2.257296265 | 0.023989569 |
| ENSG00000204165 | 0.633352701 | -0.456727822 | -1.966821321 | 0.049203814 |
| ENSG00000118496 | 1.488266123 | 0.397611766 | 2.063655552 | 0.039050386 |
| ENSG00000186417 | 1.378050457 | 0.320669788 | 1.982252013 | 0.047451042 |
| ENSG00000188488 | 1.344388225 | 0.295939059 | 2.389345969 | 0.0168784 |
| ENSG00000068323 | 0.721301721 | -0.326697754 | -2.108169931 | 0.035016293 |
| ENSG00000105669 | 0.605852727 | -0.501118348 | -2.424796379 | 0.015316975 |
| ENSG00000141002 | 0.635666614 | -0.453081044 | -2.658107676 | 0.007858078 |
| ENSG00000175567 | 0.582461401 | -0.540492361 | -2.798088346 | 0.005140605 |
| ENSG00000120913 | 0.657787982 | -0.418872616 | -2.025008733 | 0.042866468 |
| ENSG00000049768 | 0.501280016 | -0.690590419 | -3.351035934 | 0.000805099 |
| ENSG00000171759 | 1.579593049 | 0.45716725 | 3.53796334 | 0.000403226 |
| ENSG00000213626 | 0.692035152 | -0.368118527 | -2.023212681 | 0.043051225 |
| ENSG00000173875 | 0.691786997 | -0.368477178 | -2.035694705 | 0.041781021 |
| ENSG00000182872 | 0.65868112 | -0.417515747 | -2.226070701 | 0.026009446 |
| ENSG00000169093 | 0.5912133 | -0.525578412 | -2.807332638 | 0.004995363 |
| ENSG00000132612 | 0.645478406 | -0.437763523 | -2.382366525 | 0.017201767 |
| ENSG00000213625 | 1.670413597 | 0.513071259 | 2.335121158 | 0.019537092 |
| ENSG00000125363 | 1.505398319 | 0.409057527 | 3.462922165 | 0.000534343 |
| ENSG00000136878 | 0.668834799 | -0.402218187 | -2.193839559 | 0.028246946 |
| ENSG00000089639 | 0.635900116 | -0.452713778 | -2.436747184 | 0.014820037 |
| ENSG00000151062 | 0.542132798 | -0.612244292 | -2.399540294 | 0.016415673 |
| ENSG00000259823 | 1.31432156 | 0.273320608 | 1.978421291 | 0.0478812 |
| ENSG00000255423 | 1.456372339 | 0.375948645 | 2.1668687 | 0.030244867 |
| ENSG00000240563 | 1.385663094 | 0.326178793 | 3.355965644 | 0.000790884 |
| ENSG00000196715 | 1.524246331 | 0.421500079 | 2.323780413 | 0.020137266 |
| ENSG00000251503 | 0.5660896 | -0.56900291 | -2.225263669 | 0.026063543 |
| ENSG00000153707 | 1.3914612 | 0.330354418 | 2.468599994 | 0.013564275 |
| ENSG00000164983 | 1.561697949 | 0.445773658 | 2.204158557 | 0.027513195 |
| ENSG00000163938 | 1.721070073 | 0.542946233 | 2.734119327 | 0.006254737 |
| ENSG00000124812 | 1.327774408 | 0.283504163 | 2.987959781 | 0.002808465 |
| ENSG00000170430 | 0.630935953 | -0.460550922 | -2.615628279 | 0.008906346 |
| ENSG00000226490 | 1.444495797 | 0.367760331 | 3.772939226 | 0.000161336 |
| ENSG00000205755 | 0.561478321 | -0.577182114 | -2.003524714 | 0.045120998 |
| ENSG00000006062 | 0.676893674 | -0.390241073 | -2.014149788 | 0.04399381 |
| ENSG00000186994 | 0.612269438 | -0.490582836 | -2.184139124 | 0.028952027 |
| ENSG00000175874 | 1.578358179 | 0.456385179 | 2.839257957 | 0.004521859 |
| ENSG00000056558 | 0.644032571 | -0.440005978 | -2.031155003 | 0.042239273 |
| ENSG00000052841 | 1.419472511 | 0.350285332 | 2.017918843 | 0.043599714 |
| ENSG00000074803 | 1.252969081 | 0.225516 | 2.646165921 | 0.008140987 |
| ENSG00000160563 | 0.651388085 | -0.428649677 | -2.325777879 | 0.020030403 |
| ENSG00000101074 | 1.462698489 | 0.38028301 | 3.108845328 | 0.0018782 |
| ENSG00000162616 | 1.380596964 | 0.322515988 | 1.965022633 | 0.049411618 |
| ENSG00000225528 | 0.530761639 | -0.633442249 | -2.369159745 | 0.017828551 |
| ENSG00000125651 | 0.608495044 | -0.496766511 | -2.738847405 | 0.006165498 |
| ENSG00000148606 | 1.468995946 | 0.384579138 | 2.073461846 | 0.038129318 |
| ENSG00000130522 | 0.548471014 | -0.600620846 | -2.698672577 | 0.006961663 |
| ENSG00000103496 | 0.660293652 | -0.415070615 | -2.411648168 | 0.015880598 |
| ENSG00000101336 | 0.644112381 | -0.439882063 | -2.458215879 | 0.013962921 |
| ENSG00000237847 | 1.240030581 | 0.215136041 | 2.465803509 | 0.01367063 |
| ENSG00000198021 | 1.352806409 | 0.302181256 | 3.107525707 | 0.001886606 |
| ENSG00000137764 | 0.703050293 | -0.352326849 | -2.125592628 | 0.033537194 |
| ENSG00000188107 | 1.303139852 | 0.264776623 | 1.973202048 | 0.048472547 |
| ENSG00000204520 | 1.439191836 | 0.364081731 | 2.076561392 | 0.037842059 |
| ENSG00000181803 | 1.504146286 | 0.408225486 | 2.952080324 | 0.003156408 |
| ENSG00000122512 | 1.481702644 | 0.393191861 | 2.12780743 | 0.033353053 |
| ENSG00000138135 | 0.6107755 | -0.493025818 | -2.158132416 | 0.030917538 |
| ENSG00000105705 | 0.55585297 | -0.587251462 | -3.012601213 | 0.00259019 |
| ENSG00000118418 | 0.671763109 | -0.397849517 | -2.138330104 | 0.032489961 |
| ENSG00000166595 | 0.669162527 | -0.401728307 | -2.066702157 | 0.038762228 |
| ENSG00000057252 | 1.496368237 | 0.403040997 | 2.262477235 | 0.023667934 |
| ENSG00000157224 | 1.44254394 | 0.36640818 | 2.534821038 | 0.011250479 |
| ENSG00000179796 | 1.230144681 | 0.207131789 | 2.339708775 | 0.019298782 |
| ENSG00000139180 | 0.665655621 | -0.406982828 | -2.037074272 | 0.0416426 |
| ENSG00000189030 | 1.417184551 | 0.348672193 | 2.518837398 | 0.011774302 |
| ENSG00000189046 | 0.613026617 | -0.489346923 | -2.421585915 | 0.015452948 |
| ENSG00000120265 | 1.62956635 | 0.488313937 | 2.342747773 | 0.019142319 |
| ENSG00000173418 | 1.433595906 | 0.360185907 | 2.02964032 | 0.042393113 |
| ENSG00000197079 | 1.826121266 | 0.602194191 | 2.178983407 | 0.029332901 |
| ENSG00000068079 | 0.669447429 | -0.401302639 | -2.154408727 | 0.031208133 |
| ENSG00000197081 | 1.817548027 | 0.597488355 | 2.490169599 | 0.012768215 |
| ENSG00000176774 | 1.284894177 | 0.250676362 | 3.462416236 | 0.000535349 |
| ENSG00000162604 | 1.501643857 | 0.406560412 | 4.099799021 | 4.14E-05 |
| ENSG00000106100 | 1.497757889 | 0.403969249 | 2.008541662 | 0.044585763 |
| ENSG00000163515 | 1.515517111 | 0.415756708 | 3.517995178 | 0.00043482 |
| ENSG00000133193 | 1.427149306 | 0.355678963 | 1.971596054 | 0.048655738 |
| ENSG00000076513 | 0.710328536 | -0.34202769 | -2.030288754 | 0.042327197 |
| ENSG00000117597 | 1.551418536 | 0.439169697 | 2.513838456 | 0.011942512 |
| ENSG00000100387 | 0.657648276 | -0.419085026 | -2.199173373 | 0.027865597 |
| ENSG00000148180 | 0.673662176 | -0.395026517 | -2.014461294 | 0.043961125 |
| ENSG00000159409 | 1.456751615 | 0.376209035 | 2.738051766 | 0.006180435 |
| ENSG00000168214 | 0.619301657 | -0.479162796 | -2.827938364 | 0.004684883 |
| ENSG00000167513 | 0.705444006 | -0.348927879 | -1.972779638 | 0.048520674 |
| ENSG00000099785 | 0.66804408 | -0.40340112 | -2.03772749 | 0.041577193 |
| ENSG00000172468 | 1.417720347 | 0.349050192 | 2.561820356 | 0.010412516 |
| ENSG00000255595 | 1.334727932 | 0.288727475 | 3.18742978 | 0.001435433 |
| ENSG00000023839 | 1.602122213 | 0.471329133 | 3.431044407 | 0.000601262 |
| ENSG00000162639 | 0.697642208 | -0.360048903 | -2.10355534 | 0.035417253 |
| ENSG00000198851 | 0.640067358 | -0.446181861 | -2.412745778 | 0.015832859 |
| ENSG00000204472 | 0.68747262 | -0.374733276 | -2.059060566 | 0.039488437 |
| ENSG00000182676 | 0.418706257 | -0.870585661 | -2.704404523 | 0.006842693 |
| ENSG00000167487 | 0.706412836 | -0.347555459 | -2.219461085 | 0.026455372 |
| ENSG00000102053 | 1.442119 | 0.36611356 | 2.207090454 | 0.027307741 |
| ENSG00000173163 | 0.554054302 | -0.590492579 | -2.715577041 | 0.006616038 |
| ENSG00000235711 | 1.210774017 | 0.191259839 | 2.016126516 | 0.043786748 |
| ENSG00000089486 | 0.665664787 | -0.406969059 | -2.132078036 | 0.033000432 |
| ENSG00000126246 | 0.602778093 | -0.506206155 | -2.281640553 | 0.02251057 |
| ENSG00000112110 | 1.486450681 | 0.396391185 | 2.024668185 | 0.042901448 |
| ENSG00000101850 | 0.63542958 | -0.453454005 | -2.564285301 | 0.010338852 |
| ENSG00000184408 | 1.357982771 | 0.306000342 | 2.760541436 | 0.005770564 |
| ENSG00000026652 | 1.372956017 | 0.316966092 | 1.96696518 | 0.049187225 |
| ENSG00000206052 | 1.24373395 | 0.218118105 | 1.984568293 | 0.047192523 |
| ENSG00000170852 | 1.650125457 | 0.50085132 | 2.34813124 | 0.018867872 |
| ENSG00000104957 | 0.631223255 | -0.460095667 | -2.359497015 | 0.018299728 |
| ENSG00000175463 | 0.631068935 | -0.460340176 | -2.289325189 | 0.022060465 |
| ENSG00000186431 | 1.3612603 | 0.308410962 | 2.160292828 | 0.030750008 |
| ENSG00000183918 | 0.60735579 | -0.498640515 | -2.157249098 | 0.030986261 |
| ENSG00000167711 | 0.586231141 | -0.534041129 | -2.49963805 | 0.012432025 |
| ENSG00000153406 | 0.504871498 | -0.683451342 | -3.298461096 | 0.000972164 |
| ENSG00000124568 | 1.531964477 | 0.426550884 | 3.44478094 | 0.000571522 |
| ENSG00000187021 | 1.247024339 | 0.220760185 | 2.469017624 | 0.013548455 |
| ENSG00000064490 | 0.527599592 | -0.639417631 | -2.261007316 | 0.023758804 |
| ENSG00000181896 | 0.606786121 | -0.499578904 | -2.369121196 | 0.01783041 |
| ENSG00000156113 | 0.554228997 | -0.590177325 | -2.067195082 | 0.038715775 |
| ENSG00000136698 | 1.298209356 | 0.260985896 | 2.390183804 | 0.016839943 |
| ENSG00000163527 | 1.442034681 | 0.366055089 | 2.039008971 | 0.041449132 |
| ENSG00000227124 | 1.465304846 | 0.382063307 | 1.988223172 | 0.046787013 |
| ENSG00000146477 | 1.590412431 | 0.463993373 | 2.498737884 | 0.012463646 |
| ENSG00000129824 | 1.298491472 | 0.261203184 | 2.179606288 | 0.029286658 |
| ENSG00000176248 | 0.686273161 | -0.376479536 | -2.144356391 | 0.032004342 |
| ENSG00000221818 | 1.263233142 | 0.23367442 | 2.784154445 | 0.005366747 |
| ENSG00000265817 | 1.288270532 | 0.253300646 | 2.584809667 | 0.009743277 |
| ENSG00000167261 | 0.61156923 | -0.491727116 | -2.012195932 | 0.044199287 |
| ENSG00000140749 | 0.654479987 | -0.423914271 | -2.101335064 | 0.035611564 |
| ENSG00000131100 | 0.638985477 | -0.447873553 | -2.320420567 | 0.020318137 |
| ENSG00000131914 | 1.48699573 | 0.396757796 | 3.386368186 | 0.000708243 |
| ENSG00000172009 | 0.602693179 | -0.506347035 | -2.689514885 | 0.007155596 |
| ENSG00000185669 | 0.55844534 | -0.582598534 | -2.517044267 | 0.011834396 |
| ENSG00000116017 | 1.525071111 | 0.422041039 | 2.386149957 | 0.017025807 |
| ENSG00000112357 | 1.64928731 | 0.500343261 | 2.724106403 | 0.006447573 |
| ENSG00000257046 | 1.220501956 | 0.199262214 | 2.203421173 | 0.027565077 |
| ENSG00000158062 | 0.679189661 | -0.386854866 | -1.990795797 | 0.046503342 |
| ENSG00000101958 | 1.487754551 | 0.397267971 | 2.698134658 | 0.006972923 |
| ENSG00000111775 | 0.666022674 | -0.406431563 | -2.075616101 | 0.037929471 |
| ENSG00000124098 | 0.666019311 | -0.406436613 | -2.144652009 | 0.031980681 |
| ENSG00000136273 | 1.550759803 | 0.438745006 | 2.915805665 | 0.003547714 |
| ENSG00000131013 | 1.697499821 | 0.529156475 | 2.313560266 | 0.020691855 |
| ENSG00000102055 | 0.4655825 | -0.764465968 | -2.269404965 | 0.023243711 |
| ENSG00000185658 | 1.5496076 | 0.438001738 | 2.119207328 | 0.034072949 |
| ENSG00000264424 | 1.392643754 | 0.331203922 | 2.432473346 | 0.014996095 |
| ENSG00000185122 | 1.509052443 | 0.411481932 | 2.341242527 | 0.019219678 |
| ENSG00000054277 | 1.458401761 | 0.377341152 | 2.059352168 | 0.039460514 |
| ENSG00000228567 | 1.377902964 | 0.320562752 | 2.6902454 | 0.007139949 |
| ENSG00000141316 | 1.469488898 | 0.384914652 | 3.141804809 | 0.001679099 |
| ENSG00000196468 | 1.673950164 | 0.515186201 | 3.960270954 | 7.49E-05 |
| ENSG00000078081 | 0.697578549 | -0.360140157 | -2.012280404 | 0.044190387 |
| ENSG00000118292 | 0.603714581 | -0.504653741 | -2.472353892 | 0.013422657 |
| ENSG00000204965 | 1.256175057 | 0.228071435 | 1.97300646 | 0.048494826 |
| ENSG00000099958 | 0.663765558 | -0.409826268 | -2.181617363 | 0.029137784 |
| ENSG00000105610 | 0.568467711 | -0.564810764 | -2.060602559 | 0.039340972 |
| ENSG00000169660 | 0.669389136 | -0.40138972 | -2.260315977 | 0.023801647 |
| ENSG00000241878 | 0.689080593 | -0.372397044 | -2.079324691 | 0.037587517 |
| ENSG00000130811 | 0.617317462 | -0.482371862 | -2.276282207 | 0.022829124 |
| ENSG00000173065 | 1.49854964 | 0.404497734 | 2.399490362 | 0.016417912 |
| ENSG00000104343 | 1.510212742 | 0.41225053 | 2.132556512 | 0.032961124 |
| ENSG00000120899 | 0.672803877 | -0.396301407 | -2.222634495 | 0.026240456 |
| ENSG00000104341 | 1.477378767 | 0.390269414 | 2.279457698 | 0.022639872 |
| ENSG00000171791 | 0.553752935 | -0.591036657 | -2.4894869 | 0.012792763 |
| ENSG00000114853 | 1.48469049 | 0.395206326 | 2.023206808 | 0.04305183 |
| ENSG00000172238 | 1.374086469 | 0.317789124 | 2.534898196 | 0.011248001 |
| ENSG00000076924 | 0.593838833 | -0.521147321 | -2.53037333 | 0.011394122 |
| ENSG00000109472 | 1.577409227 | 0.455783772 | 2.724210793 | 0.006445535 |
| ENSG00000197901 | 1.238159687 | 0.213626154 | 2.325461748 | 0.020047283 |
| ENSG00000196266 | 1.33094918 | 0.285892357 | 3.089666748 | 0.002003812 |
| ENSG00000197272 | 0.550549765 | -0.596837927 | -2.052504003 | 0.040120706 |
| ENSG00000197706 | 1.267391061 | 0.236960505 | 2.632264996 | 0.008481768 |
| ENSG00000079999 | 0.617134107 | -0.482668926 | -2.522027209 | 0.011668068 |
| ENSG00000162191 | 0.625234925 | -0.46962782 | -2.25141659 | 0.024359164 |
| ENSG00000188042 | 0.677429515 | -0.389449768 | -2.251706924 | 0.024340799 |
| ENSG00000156802 | 1.610543093 | 0.476571447 | 2.13297319 | 0.032926926 |
| ENSG00000249693 | 1.302064881 | 0.263951374 | 2.61059998 | 0.009038355 |
| ENSG00000101307 | 0.488701372 | -0.716003668 | -2.153087332 | 0.031311816 |
| ENSG00000001036 | 1.646763928 | 0.498812106 | 2.703842216 | 0.006854283 |
| ENSG00000163481 | 0.688230487 | -0.373631487 | -2.018293741 | 0.043560678 |
| ENSG00000164398 | 1.492249954 | 0.400285017 | 2.591034849 | 0.00956878 |
| ENSG00000142973 | 0.624445743 | -0.470890834 | -2.089623831 | 0.036651604 |
| ENSG00000131153 | 0.602189446 | -0.507183189 | -2.740745281 | 0.006130001 |
| ENSG00000149489 | 0.642278026 | -0.442734006 | -2.052973537 | 0.040075144 |
| ENSG00000041357 | 0.660994351 | -0.414009985 | -2.097831502 | 0.035920033 |
| ENSG00000144785 | 1.3039175 | 0.265373194 | 1.975567992 | 0.048203727 |
| ENSG00000145147 | 0.574231348 | -0.554722918 | -1.969134232 | 0.048937679 |
| ENSG00000151365 | 1.417631062 | 0.348987213 | 3.527428526 | 0.000419617 |
| ENSG00000111729 | 0.63127459 | -0.460014345 | -2.130801064 | 0.033105535 |
| ENSG00000124678 | 0.671795384 | -0.397801473 | -1.980898432 | 0.047602665 |
| ENSG00000187186 | 0.620713866 | -0.476885067 | -2.026940419 | 0.042668506 |
| ENSG00000255552 | 1.407129306 | 0.341551676 | 2.665031255 | 0.007698117 |
| ENSG00000099399 | 1.237812745 | 0.213345907 | 1.99200248 | 0.046370786 |
| ENSG00000137996 | 1.483296695 | 0.394267107 | 2.288476545 | 0.022109785 |
| ENSG00000187550 | 1.231120466 | 0.207924703 | 2.279325337 | 0.022647733 |
| ENSG00000168334 | 0.33506487 | -1.093431125 | -2.005079905 | 0.044954505 |
| ENSG00000277556 | 1.411395434 | 0.344578884 | 2.589316407 | 0.009616669 |
| ENSG00000106803 | 0.657596754 | -0.419163372 | -2.172678578 | 0.029804517 |
| ENSG00000141580 | 1.440574799 | 0.3650422 | 2.038606299 | 0.041489336 |
| ENSG00000272398 | 1.504442875 | 0.408422647 | 2.614642106 | 0.0089321 |
| ENSG00000115386 | 1.414610674 | 0.346854351 | 2.907239267 | 0.003646342 |
| ENSG00000136986 | 1.807795464 | 0.592108127 | 3.107296442 | 0.00188807 |
| ENSG00000055211 | 1.453226579 | 0.373786311 | 2.039120504 | 0.041438002 |
| ENSG00000181541 | 1.345505736 | 0.296769954 | 2.396474338 | 0.016553653 |
| ENSG00000100027 | 0.63489134 | -0.454301414 | -1.969604525 | 0.048883713 |
| ENSG00000116031 | 0.598740216 | -0.512927472 | -2.14276917 | 0.032131638 |
| ENSG00000139438 | 0.585747943 | -0.534865713 | -2.507447496 | 0.012160665 |
| ENSG00000167515 | 0.617411319 | -0.482219834 | -2.480364112 | 0.013124828 |
| ENSG00000114904 | 1.564436426 | 0.447525648 | 2.183216097 | 0.0290199 |
| ENSG00000255073 | 1.375602959 | 0.31889215 | 2.208454324 | 0.027212618 |
| ENSG00000178980 | 0.611051654 | -0.492573784 | -2.417958903 | 0.015607839 |
| ENSG00000155287 | 0.666207353 | -0.406154316 | -2.367824695 | 0.017893012 |
| ENSG00000031691 | 1.621505192 | 0.483354849 | 2.325357519 | 0.020052851 |
| ENSG00000154342 | 0.503762579 | -0.685650196 | -2.702840897 | 0.006874965 |
| ENSG00000126524 | 1.681970783 | 0.519966191 | 2.802626667 | 0.005068831 |
| ENSG00000133063 | 0.58546066 | -0.535356288 | -1.99894072 | 0.045614768 |
| ENSG00000066651 | 1.704801463 | 0.53344866 | 2.510907001 | 0.012042142 |
| ENSG00000169413 | 0.669907352 | -0.400615857 | -2.055814554 | 0.039800395 |
| ENSG00000196405 | 0.716222432 | -0.333764501 | -1.976354647 | 0.048114624 |
| ENSG00000165688 | 0.689052976 | -0.372437123 | -1.970989612 | 0.048725064 |
| ENSG00000164754 | 1.801474821 | 0.588605674 | 2.368792604 | 0.017846258 |
| ENSG00000278318 | 1.382017239 | 0.323544199 | 2.16868416 | 0.030106671 |
| ENSG00000130313 | 0.656531961 | -0.420783902 | -2.033547507 | 0.041997239 |
| ENSG00000100258 | 0.638038065 | -0.449357335 | -2.522302972 | 0.011658924 |
| ENSG00000145555 | 1.452815446 | 0.373503361 | 2.156254726 | 0.03106378 |
| ENSG00000010270 | 1.454605199 | 0.374734523 | 2.027295899 | 0.042632161 |
| ENSG00000165695 | 0.639242914 | -0.44747075 | -2.064367883 | 0.038982849 |
| ENSG00000187559 | 0.590308704 | -0.527109653 | -2.000065101 | 0.045493235 |
| ENSG00000189433 | 0.646182529 | -0.436673262 | -2.352005924 | 0.018672478 |
| ENSG00000181092 | 1.366004339 | 0.311889937 | 3.476350873 | 0.000508287 |
| ENSG00000156162 | 2.156119107 | 0.768309896 | 3.402828764 | 0.000666921 |
| ENSG00000115604 | 0.620891265 | -0.476599309 | -2.343287858 | 0.019114629 |
| ENSG00000152207 | 0.53763979 | -0.620566479 | -2.210427248 | 0.027075524 |
| ENSG00000164512 | 0.509551075 | -0.674225186 | -2.024387385 | 0.042930309 |
| ENSG00000124496 | 1.667589444 | 0.511379137 | 2.514021124 | 0.011936328 |
| ENSG00000181450 | 1.492652535 | 0.400554762 | 2.321314523 | 0.020269875 |
| ENSG00000230989 | 0.667261355 | -0.404573474 | -2.158809976 | 0.030864912 |
| ENSG00000131721 | 1.262051149 | 0.232738294 | 2.130703997 | 0.033113536 |
| ENSG00000259571 | 1.409155027 | 0.342990253 | 2.30683253 | 0.021064158 |
| ENSG00000105612 | 0.628157597 | -0.464964193 | -2.506675609 | 0.01218725 |
| ENSG00000249139 | 1.283819558 | 0.249839664 | 2.714221818 | 0.006643167 |
| ENSG00000169740 | 0.701548329 | -0.354465488 | -1.970194814 | 0.048816048 |
| ENSG00000104679 | 0.606033515 | -0.500819989 | -2.526983676 | 0.011504685 |
| ENSG00000215440 | 0.698988759 | -0.358120619 | -2.055223576 | 0.039857415 |
| ENSG00000240045 | 1.294436376 | 0.258075369 | 2.12278044 | 0.033772255 |
| ENSG00000135744 | 1.422334653 | 0.352299643 | 2.21025948 | 0.027087159 |
| ENSG00000163815 | 0.622161929 | -0.474554885 | -2.008080164 | 0.044634774 |
| ENSG00000106609 | 1.517134362 | 0.416823268 | 2.414297093 | 0.015765601 |
| ENSG00000142961 | 0.698290768 | -0.359119689 | -1.986511575 | 0.046976549 |
| ENSG00000169508 | 0.649073369 | -0.432209519 | -2.139916823 | 0.032361489 |
| ENSG00000155097 | 1.452749964 | 0.373458287 | 2.067356642 | 0.038700561 |
| ENSG00000136856 | 0.693378899 | -0.366178678 | -2.04642612 | 0.040714464 |
| ENSG00000014164 | 1.698263855 | 0.529606467 | 2.782332752 | 0.005396967 |
| ENSG00000121210 | 0.656392734 | -0.420995989 | -2.413581393 | 0.015796599 |
| ENSG00000196735 | 0.696267436 | -0.362021445 | -2.001420133 | 0.045347133 |
| ENSG00000250254 | 0.496124291 | -0.700928796 | -2.377002665 | 0.017453962 |
| ENSG00000146729 | 1.408705074 | 0.342670895 | 1.961435871 | 0.049828199 |
| ENSG00000155096 | 1.674875358 | 0.51573875 | 2.635509074 | 0.008401118 |
| ENSG00000162992 | 1.510703402 | 0.412575371 | 3.486125272 | 0.000490071 |
| ENSG00000160654 | 0.611051892 | -0.492573394 | -2.244983872 | 0.024769168 |
| ENSG00000108798 | 0.676132564 | -0.391366122 | -2.096063953 | 0.036076518 |
| ENSG00000204361 | 1.486810837 | 0.396633448 | 3.359541876 | 0.000780718 |
| ENSG00000171316 | 1.619870004 | 0.482345901 | 2.593346971 | 0.009504683 |
| ENSG00000169760 | 1.31749694 | 0.275733679 | 2.891574554 | 0.003833166 |
| ENSG00000244355 | 1.441371428 | 0.365595041 | 3.13026615 | 0.00174648 |
| ENSG00000138068 | 1.652468955 | 0.502270506 | 2.908618746 | 0.003630293 |
| ENSG00000136286 | 0.674998028 | -0.39304551 | -1.980182877 | 0.047682983 |
| ENSG00000164506 | 1.539184917 | 0.431253002 | 2.690234682 | 0.007140179 |
| ENSG00000164924 | 1.818173639 | 0.597832502 | 3.122503636 | 0.001793199 |
| ENSG00000157150 | 1.496179553 | 0.402914895 | 3.214952223 | 0.001304662 |
| ENSG00000132693 | 1.442556022 | 0.366416555 | 3.531922062 | 0.000412551 |
| ENSG00000147654 | 1.688821683 | 0.524031057 | 2.772111107 | 0.005569402 |
| ENSG00000120992 | 1.716239069 | 0.540135309 | 2.563644969 | 0.010357944 |
| ENSG00000121903 | 1.467794749 | 0.383761104 | 2.025192988 | 0.042847551 |
| ENSG00000105122 | 0.654343081 | -0.424123476 | -2.210128121 | 0.027096272 |
| ENSG00000139193 | 0.565150144 | -0.570663841 | -2.762609885 | 0.005734126 |
| ENSG00000158516 | 1.226663485 | 0.204297869 | 2.109559693 | 0.034896299 |
| ENSG00000185359 | 1.629776326 | 0.488442782 | 1.965600191 | 0.049344812 |
| ENSG00000163154 | 0.639178978 | -0.447570772 | -2.28568997 | 0.022272402 |
| ENSG00000145287 | 0.569774402 | -0.562514783 | -2.631134242 | 0.008510041 |
| ENSG00000205090 | 1.426899183 | 0.355503686 | 2.236071636 | 0.025347079 |
| ENSG00000149084 | 1.572234466 | 0.452497834 | 2.469110563 | 0.013544936 |
| ENSG00000204381 | 0.599082135 | -0.51235657 | -2.465178067 | 0.013694518 |
| ENSG00000248099 | 0.528381457 | -0.637936799 | -2.457774007 | 0.013980112 |
| ENSG00000163586 | 1.461301613 | 0.379327555 | 3.150054004 | 0.001632403 |
| ENSG00000119900 | 0.687523981 | -0.374658569 | -2.023252721 | 0.043047099 |
| ENSG00000085511 | 1.52649801 | 0.42297623 | 2.206236612 | 0.027367437 |
| ENSG00000011105 | 0.66688516 | -0.405137422 | -2.166083099 | 0.030304837 |
| ENSG00000100429 | 0.66399336 | -0.409483129 | -2.293849263 | 0.021799159 |
| ENSG00000138308 | 1.458462278 | 0.377382646 | 3.140046061 | 0.001689213 |
| ENSG00000197170 | 1.611541658 | 0.477191272 | 2.737969709 | 0.006181977 |
| ENSG00000012061 | 0.633722545 | -0.456144047 | -2.321033023 | 0.020285062 |
| ENSG00000064300 | 0.606661441 | -0.499784401 | -2.487291052 | 0.012872004 |
| ENSG00000160318 | 0.464668666 | -0.766430673 | -3.15882793 | 0.00158405 |
| ENSG00000148341 | 0.662803466 | -0.411276764 | -2.212271758 | 0.026947893 |
| ENSG00000143418 | 1.517178917 | 0.416852635 | 2.027416477 | 0.042619838 |
| ENSG00000239713 | 0.615872314 | -0.484715619 | -2.576380427 | 0.009984073 |
| ENSG00000168899 | 0.657161716 | -0.419825148 | -2.321698033 | 0.020249201 |
| ENSG00000135766 | 1.522004631 | 0.420028302 | 2.453340028 | 0.014153648 |
| ENSG00000156469 | 1.596738314 | 0.467962995 | 2.518903375 | 0.011772096 |
| ENSG00000277203 | 0.616110513 | -0.484328927 | -2.705931973 | 0.0068113 |
| ENSG00000160593 | 0.602537203 | -0.506605867 | -2.39147516 | 0.016780819 |
| ENSG00000166501 | 0.536255937 | -0.623143738 | -2.588299678 | 0.009645103 |
| ENSG00000138670 | 0.656220254 | -0.421258794 | -2.136693159 | 0.032622957 |
| ENSG00000059588 | 1.486215797 | 0.396233156 | 2.084003998 | 0.037159804 |
| ENSG00000275714 | 0.576506427 | -0.550768791 | -2.219368628 | 0.026461656 |
| ENSG00000100926 | 1.449952896 | 0.37153107 | 2.251769959 | 0.024336813 |
| ENSG00000111913 | 0.505275706 | -0.682651046 | -2.580827821 | 0.009856373 |
| ENSG00000213931 | 1.599375931 | 0.46961351 | 2.475777601 | 0.013294636 |
| ENSG00000104964 | 0.617511964 | -0.482056836 | -2.495511892 | 0.012577554 |
| ENSG00000090661 | 0.646253679 | -0.43656316 | -2.610491644 | 0.009041218 |
| ENSG00000064393 | 1.474345895 | 0.38821443 | 2.30048227 | 0.021420913 |
| ENSG00000106392 | 1.526424684 | 0.422928193 | 2.447516751 | 0.014384444 |
| ENSG00000205038 | 1.296136533 | 0.259387942 | 2.271228986 | 0.02313312 |
| ENSG00000121853 | 1.345055948 | 0.296435609 | 2.59545622 | 0.009446544 |
| ENSG00000126353 | 0.507939893 | -0.677392158 | -3.026097023 | 0.002477328 |
| ENSG00000278139 | 1.308826594 | 0.269131006 | 2.067128117 | 0.038722083 |
| ENSG00000126768 | 0.626192898 | -0.468096811 | -2.34292367 | 0.019133297 |
| ENSG00000160445 | 0.589792911 | -0.527983802 | -3.098439022 | 0.00194543 |
| ENSG00000172349 | 0.618086953 | -0.481126131 | -2.160360043 | 0.030744808 |
| ENSG00000166006 | 1.517997833 | 0.417392251 | 3.533976452 | 0.000409358 |
| ENSG00000205581 | 1.55417688 | 0.440946068 | 2.307466099 | 0.02102885 |
| ENSG00000278828 | 0.642099921 | -0.443011348 | -2.328509548 | 0.019885063 |
| ENSG00000215305 | 0.697855284 | -0.359743527 | -2.047181945 | 0.040640223 |
| ENSG00000178473 | 1.324769612 | 0.281238567 | 2.126104727 | 0.03349454 |
| ENSG00000120256 | 1.839238942 | 0.609351868 | 3.02163564 | 0.00251413 |
| ENSG00000134909 | 1.422198885 | 0.352204184 | 2.048127127 | 0.040547544 |
| ENSG00000072133 | 1.368933121 | 0.314031693 | 2.447411787 | 0.014388634 |
| ENSG00000143954 | 1.315590694 | 0.274285762 | 2.802319996 | 0.005073652 |
| ENSG00000105997 | 1.525418442 | 0.422268761 | 2.23923681 | 0.025140512 |
| ENSG00000162819 | 1.476270949 | 0.389519279 | 2.158066632 | 0.030922652 |
| ENSG00000180353 | 0.655420195 | -0.42247873 | -2.105879935 | 0.035214783 |
| ENSG00000132394 | 0.601584965 | -0.508187499 | -2.681672396 | 0.007325516 |
| ENSG00000214510 | 1.455929854 | 0.375644771 | 2.313957071 | 0.020670077 |
| ENSG00000172167 | 1.528086666 | 0.424016408 | 2.197689838 | 0.027971216 |
| ENSG00000122679 | 0.642942766 | -0.441699569 | -2.065844195 | 0.038843194 |
| ENSG00000122986 | 0.656516671 | -0.420807192 | -2.041261716 | 0.04122482 |
| ENSG00000266997 | 1.403466113 | 0.338944972 | 2.232527291 | 0.025580134 |
| ENSG00000011590 | 0.451176734 | -0.795896144 | -2.958622695 | 0.003090172 |
| ENSG00000108771 | 0.535278754 | -0.624967633 | -2.843610033 | 0.00446056 |
| ENSG00000181903 | 1.481861837 | 0.393299295 | 3.304533664 | 0.000951345 |
| ENSG00000135314 | 0.654867954 | -0.42332166 | -2.037094657 | 0.041640557 |
| ENSG00000107738 | 0.720226656 | -0.328189317 | -2.033734974 | 0.041978324 |
| ENSG00000135316 | 1.741896767 | 0.554974615 | 2.542683665 | 0.011000477 |
| ENSG00000101558 | 1.631836739 | 0.489706214 | 2.559252505 | 0.010489752 |
| ENSG00000241635 | 1.471668753 | 0.386396963 | 2.816447011 | 0.004855805 |
| ENSG00000147676 | 1.581715168 | 0.458509807 | 2.598153748 | 0.009372652 |
| ENSG00000130812 | 0.590550326 | -0.526700421 | -2.338664095 | 0.019352825 |
| ENSG00000187688 | 0.689186738 | -0.372243017 | -2.015150458 | 0.043888887 |
| ENSG00000243489 | 1.387054499 | 0.327182434 | 2.803984808 | 0.005047528 |
| ENSG00000255154 | 1.50696979 | 0.410100873 | 2.569403825 | 0.010187367 |
| ENSG00000132915 | 1.487404785 | 0.397032846 | 3.007142267 | 0.002637163 |
| ENSG00000134138 | 0.601550429 | -0.508244909 | -2.449618562 | 0.014300762 |
| ENSG00000077463 | 0.666744463 | -0.405348421 | -2.166459813 | 0.030276068 |
| ENSG00000180210 | 1.381042219 | 0.322838446 | 2.322393084 | 0.020211779 |
| ENSG00000109063 | 0.531242215 | -0.632537213 | -2.636257887 | 0.0083826 |
| ENSG00000265763 | 0.65733113 | -0.419567385 | -2.011507702 | 0.044271858 |
| ENSG00000105325 | 0.540469808 | -0.615316503 | -2.878181072 | 0.003999755 |
| ENSG00000124227 | 1.225067393 | 0.202995857 | 1.978043495 | 0.0479238 |
| ENSG00000198093 | 1.468120297 | 0.383982873 | 2.145007809 | 0.031952223 |
| ENSG00000136628 | 1.473924247 | 0.3879284 | 2.066087418 | 0.038820226 |
| ENSG00000187678 | 1.459414979 | 0.378035656 | 2.352232747 | 0.018661094 |
| ENSG00000128185 | 0.554292673 | -0.590062442 | -3.106127692 | 0.001895548 |
| ENSG00000079841 | 1.360217354 | 0.307644506 | 2.078550951 | 0.037658643 |
| ENSG00000105854 | 1.596535725 | 0.46783611 | 2.495085787 | 0.012592668 |
| ENSG00000118702 | 11.76746014 | 2.465338107 | 3.641055676 | 0.000271522 |
| ENSG00000068097 | 1.388859234 | 0.328482715 | 2.203343549 | 0.027570544 |
| ENSG00000103227 | 0.696929431 | -0.36107112 | -1.989864501 | 0.046605864 |
| ENSG00000124159 | 0.430531485 | -0.842734823 | -2.299992955 | 0.021448619 |
| ENSG00000138100 | 0.555285888 | -0.588272184 | -1.97949183 | 0.047760659 |
| ENSG00000167967 | 0.652416811 | -0.427071641 | -2.006251109 | 0.044829463 |
| ENSG00000186827 | 0.637118015 | -0.450800374 | -2.259974815 | 0.023822814 |
| ENSG00000157554 | 1.477219241 | 0.390161429 | 2.421310574 | 0.015464659 |
| ENSG00000170027 | 1.514213308 | 0.414896036 | 2.263728986 | 0.023590789 |
| ENSG00000130717 | 0.519868977 | -0.654178466 | -3.284085385 | 0.001023139 |
| ENSG00000105639 | 0.610539369 | -0.493412502 | -2.747972506 | 0.005996504 |
| ENSG00000113396 | 1.264286037 | 0.234507566 | 2.032477639 | 0.042105325 |
| ENSG00000102879 | 0.692609869 | -0.367288398 | -2.158587931 | 0.03088215 |
| ENSG00000185002 | 1.319972115 | 0.277610612 | 3.377477404 | 0.00073154 |
| ENSG00000101997 | 0.617870128 | -0.481476992 | -2.432650303 | 0.014988769 |
| ENSG00000134574 | 0.587084917 | -0.532585806 | -3.073790156 | 0.00211358 |
| ENSG00000106004 | 1.503789747 | 0.40798842 | 2.256109659 | 0.024063764 |
| ENSG00000023902 | 0.594196362 | -0.520545439 | -2.615556296 | 0.008908223 |
| ENSG00000096996 | 0.593364083 | -0.521947101 | -2.391828926 | 0.016764655 |
| ENSG00000068831 | 0.625405417 | -0.469355172 | -2.163714319 | 0.030486281 |
| ENSG00000081087 | 1.464406433 | 0.381449995 | 1.963909022 | 0.049540643 |
| ENSG00000152952 | 1.492082762 | 0.400172971 | 2.101613588 | 0.035587139 |
| ENSG00000100298 | 0.573637213 | -0.555758116 | -2.469096834 | 0.013545456 |
| ENSG00000072134 | 1.518026075 | 0.417410856 | 2.283934467 | 0.022375383 |
| ENSG00000172023 | 1.529686885 | 0.425063064 | 3.797280694 | 0.000146292 |
| ENSG00000140564 | 1.530994655 | 0.425917626 | 2.163624301 | 0.030493195 |
| ENSG00000122674 | 1.765856511 | 0.568635848 | 3.038897959 | 0.002374453 |
| ENSG00000196860 | 0.647981413 | -0.433893267 | -2.089199833 | 0.036689738 |
| ENSG00000204979 | 1.544184328 | 0.434495828 | 3.61125427 | 0.00030472 |
| ENSG00000138629 | 0.600118532 | -0.51062809 | -2.538289514 | 0.011139579 |
| ENSG00000154710 | 1.456212274 | 0.375838732 | 2.26796163 | 0.023331545 |
| ENSG00000265241 | 0.660504839 | -0.414750829 | -2.335905536 | 0.019496165 |
| ENSG00000188674 | 1.201690029 | 0.183728923 | 2.081223859 | 0.037413421 |
| ENSG00000130592 | 0.668540267 | -0.402658649 | -2.194923492 | 0.028169086 |
| ENSG00000176046 | 0.690516605 | -0.370315259 | -2.082498031 | 0.037297003 |
| ENSG00000159199 | 0.635827868 | -0.452827401 | -2.116253054 | 0.034323291 |
| ENSG00000108924 | 0.619152904 | -0.479403019 | -2.286587205 | 0.022219929 |
| ENSG00000155850 | 1.60668111 | 0.474170629 | 2.650235056 | 0.008043579 |
| ENSG00000151838 | 1.370199471 | 0.314956329 | 2.705375333 | 0.006822725 |
| ENSG00000122477 | 1.384008706 | 0.324984147 | 1.96301673 | 0.04964423 |
| ENSG00000115504 | 1.474133657 | 0.388070466 | 2.193271045 | 0.028287857 |
| ENSG00000074695 | 1.571948213 | 0.45231575 | 2.074698278 | 0.038014507 |
| ENSG00000204424 | 1.400141899 | 0.336573588 | 2.587063998 | 0.009679761 |
| ENSG00000113100 | 1.502933106 | 0.407418603 | 3.367460489 | 0.000758639 |
| ENSG00000166484 | 1.501217931 | 0.406276733 | 2.126098597 | 0.033495051 |
| ENSG00000135763 | 1.481923352 | 0.393340806 | 2.229444921 | 0.025784316 |
| ENSG00000095110 | 1.482023968 | 0.393408699 | 3.350538188 | 0.000806547 |
| ENSG00000103375 | 1.453809005 | 0.374187012 | 2.962285772 | 0.003053642 |
| ENSG00000156486 | 1.20609431 | 0.187387296 | 2.218436542 | 0.026525082 |
| ENSG00000154930 | 0.669359866 | -0.401433447 | -2.095550581 | 0.036122077 |
| ENSG00000130558 | 0.655311754 | -0.422644196 | -2.023180514 | 0.04305454 |
| ENSG00000011132 | 0.702759179 | -0.352741008 | -1.960172609 | 0.049975619 |
| ENSG00000180043 | 1.35358119 | 0.302753814 | 2.05542034 | 0.039838423 |
| ENSG00000171431 | 1.388397129 | 0.328149937 | 2.445841838 | 0.014451438 |
| ENSG00000116750 | 1.662040129 | 0.508045841 | 2.631412032 | 0.008503088 |
| ENSG00000212993 | 1.504746255 | 0.408624283 | 3.14748965 | 0.001646789 |
| ENSG00000178149 | 1.540800408 | 0.432302027 | 2.379035951 | 0.017357983 |
| ENSG00000170523 | 1.435817489 | 0.361734366 | 2.373722786 | 0.017609766 |
| ENSG00000165182 | 1.432390767 | 0.359344913 | 2.879949735 | 0.003977386 |
| ENSG00000161944 | 0.57644068 | -0.550882841 | -2.313552828 | 0.020692264 |
| ENSG00000175073 | 1.547183307 | 0.436436056 | 2.128732913 | 0.033276364 |
| ENSG00000186479 | 1.232119103 | 0.208735535 | 1.98771427 | 0.0468433 |
| ENSG00000163564 | 0.603408934 | -0.505160146 | -2.058426256 | 0.039549233 |
| ENSG00000130935 | 1.480195966 | 0.392174488 | 2.263458753 | 0.023607424 |
| ENSG00000100151 | 0.707105705 | -0.346575112 | -2.094570377 | 0.036209201 |
| ENSG00000189326 | 1.300479716 | 0.262733209 | 2.088717455 | 0.036733165 |
| ENSG00000115286 | 0.59328871 | -0.522074135 | -2.568852678 | 0.010203583 |
| ENSG00000171004 | 1.378825058 | 0.321231729 | 1.994275039 | 0.046122006 |
| ENSG00000124657 | 0.581680591 | -0.541833794 | -2.227725503 | 0.025898825 |
| ENSG00000184500 | 1.431258323 | 0.358554003 | 1.996939774 | 0.045831726 |
| ENSG00000066855 | 1.592059841 | 0.465028676 | 2.586966328 | 0.009682505 |
| ENSG00000111911 | 1.497292352 | 0.403658378 | 2.101025553 | 0.035638723 |
| ENSG00000187908 | 1.3829796 | 0.324240302 | 2.146399131 | 0.031841149 |
| ENSG00000143870 | 1.844962087 | 0.612458728 | 2.762622307 | 0.005733907 |
| ENSG00000189181 | 1.246114268 | 0.220030124 | 2.764546832 | 0.005700192 |
| ENSG00000162517 | 0.684075751 | -0.379686621 | -2.004818741 | 0.044982428 |
| ENSG00000197273 | 1.348003177 | 0.298624369 | 2.108653851 | 0.034974471 |
| ENSG00000136003 | 0.63109004 | -0.460306732 | -2.457620973 | 0.01398607 |
| ENSG00000104267 | 1.403992354 | 0.339319859 | 1.964553548 | 0.049465933 |
| ENSG00000196900 | 1.494638091 | 0.401884098 | 2.559370656 | 0.010486187 |
| ENSG00000135535 | 1.559696022 | 0.444490945 | 2.69164791 | 0.007109996 |
| ENSG00000135870 | 1.468455048 | 0.38421086 | 2.071734319 | 0.038290225 |
| ENSG00000005700 | 1.407648781 | 0.341920781 | 2.069161446 | 0.038530939 |
| ENSG00000033122 | 1.257054971 | 0.228771661 | 2.183307381 | 0.029013181 |
| ENSG00000099910 | 0.547998267 | -0.601483155 | -3.274146128 | 0.001059818 |
| ENSG00000173726 | 1.590571014 | 0.46409308 | 2.707261521 | 0.006784079 |
| ENSG00000123684 | 1.392399169 | 0.33102828 | 2.064612946 | 0.038959637 |
| ENSG00000101945 | 0.693867745 | -0.365473905 | -1.993885576 | 0.046164561 |
| ENSG00000149428 | 1.589519531 | 0.463431789 | 2.292268999 | 0.021890126 |
| ENSG00000148362 | 0.59757414 | -0.514876919 | -2.646203505 | 0.008140083 |
| ENSG00000139155 | 1.272710687 | 0.241149025 | 3.05165577 | 0.002275829 |
| ENSG00000104472 | 1.486281588 | 0.396277422 | 2.068263241 | 0.038615276 |
| ENSG00000143815 | 1.570526462 | 0.451410889 | 2.342459762 | 0.0191571 |
| ENSG00000271793 | 1.258854176 | 0.230201923 | 2.202814819 | 0.027607803 |
| ENSG00000160808 | 1.451748728 | 0.372768849 | 2.799607144 | 0.005116483 |
| ENSG00000114374 | 1.31528226 | 0.274051289 | 2.477691682 | 0.013223536 |
| ENSG00000148834 | 0.637420928 | -0.450325044 | -2.416597257 | 0.01566634 |
| ENSG00000183291 | 1.427660426 | 0.356037039 | 1.967056384 | 0.049176711 |
| ENSG00000137270 | 1.411011951 | 0.344307143 | 2.594815765 | 0.009464163 |
| ENSG00000244588 | 1.298285498 | 0.261044546 | 2.697449575 | 0.006987287 |
| ENSG00000173744 | 1.564068864 | 0.447290672 | 2.523140947 | 0.011631177 |
| ENSG00000271503 | 0.683585956 | -0.380402872 | -2.242453931 | 0.02493205 |
| ENSG00000143498 | 1.771908956 | 0.572057471 | 3.117507359 | 0.001823874 |
| ENSG00000122642 | 1.556299239 | 0.44231072 | 2.387312504 | 0.016972058 |
| ENSG00000166363 | 1.327609589 | 0.283380023 | 2.112711057 | 0.034625506 |
| ENSG00000214652 | 1.394357634 | 0.332433832 | 2.741344794 | 0.006118826 |
| ENSG00000145358 | 1.333881201 | 0.288092889 | 2.074591433 | 0.038024417 |
| ENSG00000149243 | 0.679452953 | -0.386467285 | -2.023545263 | 0.043016962 |
| ENSG00000187837 | 0.627446722 | -0.466096516 | -2.720733908 | 0.006513717 |
| ENSG00000197629 | 0.638122887 | -0.449224401 | -2.36808857 | 0.017880255 |
| ENSG00000131495 | 0.642430491 | -0.442496653 | -2.060241251 | 0.039375483 |
| ENSG00000143570 | 1.533110431 | 0.427298633 | 2.437262937 | 0.014798914 |
| ENSG00000105472 | 0.622646799 | -0.473775857 | -2.305183021 | 0.021156325 |
| ENSG00000160791 | 0.678384152 | -0.388041555 | -2.025130483 | 0.042853968 |
| ENSG00000158292 | 1.500781128 | 0.405985724 | 2.401939562 | 0.016308403 |
| ENSG00000196109 | 1.430216024 | 0.357825499 | 2.39618771 | 0.016566604 |
| ENSG00000176194 | 1.312374752 | 0.271838284 | 1.990614526 | 0.046523282 |
| ENSG00000174600 | 0.664327122 | -0.408980597 | -2.009414329 | 0.044493212 |
| ENSG00000175097 | 1.23784185 | 0.21336942 | 2.342026248 | 0.019179366 |
| ENSG00000171497 | 1.707601488 | 0.535089747 | 2.196585888 | 0.028050035 |
| ENSG00000143612 | 1.436143433 | 0.36196135 | 2.002529193 | 0.045227847 |
| ENSG00000173452 | 1.178154814 | 0.163949497 | 2.013767911 | 0.044033906 |
| ENSG00000103490 | 0.660563071 | -0.41466267 | -2.066415798 | 0.038789235 |
| ENSG00000159131 | 1.566557013 | 0.448880226 | 2.253892552 | 0.024202928 |
| ENSG00000186648 | 0.557558421 | -0.58418799 | -2.09271498 | 0.036374605 |
| ENSG00000176401 | 0.665297425 | -0.407521082 | -2.007709365 | 0.044674185 |
| ENSG00000104613 | 0.692328764 | -0.367694344 | -1.992466339 | 0.046319915 |
| ENSG00000185803 | 1.627809061 | 0.487234976 | 2.697562014 | 0.006984927 |
| ENSG00000104413 | 1.691078785 | 0.525366659 | 2.476818987 | 0.013255911 |
| ENSG00000124205 | 1.285578415 | 0.251208745 | 2.183049733 | 0.029032148 |
| ENSG00000136152 | 1.438388312 | 0.363523259 | 1.992670867 | 0.0462975 |
| ENSG00000155660 | 1.469205074 | 0.384721488 | 2.097699151 | 0.03593173 |
| ENSG00000134443 | 0.562838873 | -0.574761885 | -2.521213476 | 0.011695088 |
| ENSG00000205629 | 0.641758398 | -0.443543374 | -2.367545209 | 0.017906532 |
| ENSG00000077157 | 0.650283024 | -0.43034759 | -1.98080054 | 0.047613646 |
| ENSG00000100056 | 0.666322752 | -0.405981113 | -2.612119548 | 0.008998278 |
| ENSG00000172016 | 1.486572691 | 0.396473263 | 3.51893783 | 0.000433278 |
| ENSG00000100162 | 0.691037331 | -0.369561433 | -2.056962417 | 0.039689841 |
| ENSG00000100239 | 0.664585811 | -0.408591272 | -2.715142612 | 0.006624724 |
| ENSG00000079616 | 0.708912788 | -0.344022768 | -2.13170373 | 0.03303121 |
| ENSG00000121895 | 0.594272648 | -0.520417062 | -2.039317043 | 0.041418396 |
| ENSG00000124196 | 0.513389487 | -0.666720487 | -2.112246716 | 0.034665294 |
| ENSG00000080546 | 1.570043342 | 0.451103226 | 2.478302312 | 0.013200924 |
| ENSG00000198356 | 0.593417301 | -0.521857416 | -2.751647174 | 0.005929637 |
| ENSG00000073169 | 0.665560064 | -0.407126391 | -2.592796608 | 0.009519905 |
| ENSG00000125910 | 0.573211521 | -0.556500483 | -2.673547928 | 0.007505355 |
| ENSG00000228253 | 1.672266949 | 0.51418016 | 2.004443623 | 0.04502256 |
| ENSG00000088038 | 1.417996891 | 0.349245236 | 2.157357739 | 0.030977801 |
| ENSG00000125968 | 1.499108095 | 0.404870328 | 2.131983025 | 0.033008242 |
| ENSG00000181847 | 0.626750781 | -0.467206296 | -2.280072972 | 0.022603361 |
| ENSG00000158615 | 1.485100477 | 0.395482431 | 1.994471721 | 0.046100527 |
| ENSG00000120438 | 1.729142136 | 0.547625411 | 2.503655382 | 0.012291769 |
| ENSG00000057663 | 1.76336742 | 0.567225288 | 2.943542912 | 0.003244788 |
| ENSG00000164181 | 0.69426382 | -0.364903247 | -2.038136939 | 0.04153624 |
| ENSG00000063180 | 0.680697873 | -0.384636723 | -2.068410098 | 0.038601476 |
| ENSG00000104442 | 1.723544555 | 0.544382958 | 2.632092889 | 0.008486066 |
| ENSG00000113269 | 0.652360579 | -0.427157834 | -2.127190619 | 0.033404248 |
| ENSG00000196747 | 0.583671364 | -0.538417188 | -2.444946708 | 0.014487355 |
| ENSG00000160050 | 0.65018705 | -0.430495188 | -1.962196163 | 0.04973965 |
| ENSG00000198398 | 1.256034801 | 0.227959775 | 2.060690498 | 0.039332577 |
| ENSG00000179526 | 1.462826396 | 0.380370452 | 2.139306496 | 0.032410854 |
| ENSG00000104231 | 1.6302671 | 0.488743866 | 2.841170196 | 0.004494832 |
| ENSG00000103653 | 0.664351948 | -0.408943228 | -2.388801537 | 0.016903431 |
| ENSG00000016490 | 1.488132075 | 0.397521692 | 3.378481 | 0.000728875 |
| ENSG00000170289 | 1.419517033 | 0.350316696 | 2.366918237 | 0.017936895 |
| ENSG00000167414 | 0.455305889 | -0.786785803 | -2.867598329 | 0.004136003 |
| ENSG00000159307 | 0.442451906 | -0.815423507 | -2.006972279 | 0.044752615 |
| ENSG00000236396 | 1.327035047 | 0.282947166 | 2.411707048 | 0.015878034 |
| ENSG00000198087 | 1.578994492 | 0.456788247 | 2.576924926 | 0.00996836 |
| ENSG00000127445 | 0.684793689 | -0.37863767 | -2.016011729 | 0.043798749 |
| ENSG00000104894 | 0.683094501 | -0.381122067 | -2.016191335 | 0.043779972 |
| ENSG00000158850 | 1.588189832 | 0.462594897 | 2.491990188 | 0.012702955 |
| ENSG00000160208 | 1.453246659 | 0.373800129 | 2.192028836 | 0.028377425 |
| ENSG00000085719 | 1.563950967 | 0.44721529 | 2.249540456 | 0.024478132 |
| ENSG00000176083 | 0.642102302 | -0.443007638 | -2.177634956 | 0.029433225 |
| ENSG00000186787 | 0.527729381 | -0.639171664 | -2.758512504 | 0.005806508 |
| ENSG00000147457 | 0.680405464 | -0.385066387 | -1.970133648 | 0.048823056 |
| ENSG00000241962 | 0.659373306 | -0.416465432 | -1.975510998 | 0.048210188 |
| ENSG00000046604 | 1.572945055 | 0.452949693 | 2.214154095 | 0.02681818 |
| ENSG00000093144 | 1.540423401 | 0.432057314 | 2.149523109 | 0.031592956 |
| ENSG00000147481 | 1.508464169 | 0.411092026 | 2.723515624 | 0.006459116 |
| ENSG00000274641 | 0.63157401 | -0.459540148 | -2.173657053 | 0.0297309 |
| ENSG00000157216 | 0.672033532 | -0.397447041 | -2.281854988 | 0.022497903 |
| ENSG00000083937 | 1.556945493 | 0.442725885 | 2.318805204 | 0.020405601 |
| ENSG00000159335 | 0.572533314 | -0.557684355 | -3.178203117 | 0.001481909 |
| ENSG00000121577 | 0.494684811 | -0.703834465 | -2.425247936 | 0.015297935 |
| ENSG00000153975 | 1.551860049 | 0.439454243 | 2.276370282 | 0.022823857 |
| ENSG00000161405 | 0.558062599 | -0.583284138 | -2.863914475 | 0.00418441 |
| ENSG00000132514 | 0.558826373 | -0.581916457 | -2.41955973 | 0.015539308 |
| ENSG00000136159 | 1.554754526 | 0.441317672 | 2.280731875 | 0.022564318 |
| ENSG00000180758 | 1.615391574 | 0.479577388 | 2.716408628 | 0.006599441 |
| ENSG00000167080 | 0.449976327 | -0.798560305 | -2.049347681 | 0.040428129 |
| ENSG00000163126 | 0.588324411 | -0.530476763 | -2.302206103 | 0.021323552 |
| ENSG00000185038 | 0.506649033 | -0.679936758 | -2.368394516 | 0.017865474 |
| ENSG00000232030 | 1.468475193 | 0.384224579 | 3.261602445 | 0.001107844 |
| ENSG00000173530 | 1.56518124 | 0.448001626 | 2.553977792 | 0.010650005 |
| ENSG00000167094 | 0.541355243 | -0.613679574 | -1.965598886 | 0.049344963 |
| ENSG00000088782 | 1.310119456 | 0.270118321 | 2.87788232 | 0.004003545 |
| ENSG00000163605 | 1.610480226 | 0.476532411 | 2.310568821 | 0.020856683 |
| ENSG00000123154 | 0.572719387 | -0.557359408 | -2.324464705 | 0.020100601 |
| ENSG00000262543 | 1.268934439 | 0.238177524 | 2.37660712 | 0.017472687 |
| ENSG00000275074 | 0.540318851 | -0.615595849 | -2.984534778 | 0.002840099 |
| ENSG00000017797 | 1.544232668 | 0.434527132 | 2.12122706 | 0.033902699 |
| ENSG00000021645 | 1.384727071 | 0.32550306 | 1.985989266 | 0.047034516 |
| ENSG00000112195 | 1.346929397 | 0.297827481 | 2.191899985 | 0.028386729 |
| ENSG00000106804 | 0.657052717 | -0.419991025 | -2.169614854 | 0.030036035 |
| ENSG00000100395 | 0.70099854 | -0.355249474 | -2.121225323 | 0.033902845 |
| ENSG00000137331 | 1.590675907 | 0.464159024 | 2.784004753 | 0.005369225 |
| ENSG00000162736 | 2.603303699 | 0.956781292 | 3.723143696 | 0.000196757 |
| ENSG00000160691 | 1.505230955 | 0.408946345 | 2.341224259 | 0.019220618 |
| ENSG00000121406 | 1.367874301 | 0.313257929 | 2.114651304 | 0.034459678 |
| ENSG00000060971 | 1.528221626 | 0.424104723 | 2.453093103 | 0.014163368 |
| ENSG00000110448 | 0.558486725 | -0.582524429 | -2.654578922 | 0.007940746 |
| ENSG00000100351 | 0.617965394 | -0.481322819 | -2.085088022 | 0.037061311 |
| ENSG00000189127 | 0.373958562 | -0.983610284 | -2.98452088 | 0.002840228 |
| ENSG00000177432 | 0.700877095 | -0.355422736 | -2.035359142 | 0.041814749 |
| ENSG00000243364 | 1.489968977 | 0.398755299 | 1.977562162 | 0.047978121 |
| ENSG00000150867 | 0.665108566 | -0.407804995 | -2.094943573 | 0.036176009 |
| ENSG00000102524 | 0.642371679 | -0.442588203 | -2.233550433 | 0.025512668 |
| ENSG00000137860 | 1.297704967 | 0.260597295 | 2.045630078 | 0.04079278 |
| ENSG00000155754 | 1.359833359 | 0.307362162 | 2.25421304 | 0.024182769 |
| ENSG00000187855 | 0.059292487 | -2.825272673 | -2.176872615 | 0.029490073 |
| ENSG00000182836 | 1.297550339 | 0.260478132 | 3.02305487 | 0.002502369 |
| ENSG00000105127 | 0.666513 | -0.405695635 | -2.380317917 | 0.017297707 |
| ENSG00000262246 | 0.636424202 | -0.451889954 | -2.244018594 | 0.024831205 |
| ENSG00000183309 | 1.527715063 | 0.423773196 | 2.185089805 | 0.028882263 |
| ENSG00000256514 | 1.293948888 | 0.257698696 | 2.13320513 | 0.032907902 |
| ENSG00000214212 | 0.614901982 | -0.486292402 | -2.234690957 | 0.025437645 |
| ENSG00000214140 | 0.349831344 | -1.050304115 | -2.079737441 | 0.037549622 |
| ENSG00000105996 | 1.465272697 | 0.382041367 | 2.615040541 | 0.008921687 |
| ENSG00000100297 | 0.60324871 | -0.505425713 | -3.102864419 | 0.001916574 |
| ENSG00000114013 | 0.684158155 | -0.379566168 | -2.074140052 | 0.038066306 |
| ENSG00000186106 | 1.626900166 | 0.486676466 | 2.57470215 | 0.010032644 |
| ENSG00000179058 | 1.374340785 | 0.317974187 | 2.150072815 | 0.031549456 |
| ENSG00000145088 | 0.456017443 | -0.785224218 | -3.441717945 | 0.000578033 |
| ENSG00000166478 | 1.511316192 | 0.412980922 | 1.996274957 | 0.045904002 |
| ENSG00000090857 | 0.667226447 | -0.404625791 | -2.212362234 | 0.026941646 |
| ENSG00000085377 | 1.627267889 | 0.486902467 | 2.431876565 | 0.015020825 |
| ENSG00000132294 | 1.544344547 | 0.434599579 | 2.051095667 | 0.040257631 |
| ENSG00000160877 | 0.668861929 | -0.402177624 | -2.173126023 | 0.029770834 |
| ENSG00000112237 | 1.615366839 | 0.479562075 | 2.689019428 | 0.007166225 |
| ENSG00000172717 | 0.540677967 | -0.614931432 | -2.432374406 | 0.015000193 |
| ENSG00000161860 | 0.607629795 | -0.498189473 | -2.38648798 | 0.017010163 |
| ENSG00000121851 | 0.653183342 | -0.42589742 | -2.458879624 | 0.013937134 |
| ENSG00000102970 | 0.440634679 | -0.819539139 | -3.100495237 | 0.001931973 |
| ENSG00000198585 | 0.650077101 | -0.430664307 | -2.347817099 | 0.018883792 |
| ENSG00000115339 | 1.443273377 | 0.366913712 | 1.987067711 | 0.046914894 |
| ENSG00000101082 | 0.645209505 | -0.438180201 | -2.102069815 | 0.035547161 |
| ENSG00000153310 | 1.63474465 | 0.491486615 | 2.51923266 | 0.011761091 |
| ENSG00000147443 | 0.666400137 | -0.405864983 | -2.148835089 | 0.031647475 |
| ENSG00000146857 | 1.291722846 | 0.255976867 | 2.45628592 | 0.014038142 |
| ENSG00000187288 | 1.294532023 | 0.258149258 | 2.221275865 | 0.026332283 |
| ENSG00000156885 | 0.572026513 | -0.558569937 | -2.093096083 | 0.036340578 |
| ENSG00000117335 | 2.46589333 | 0.902554147 | 3.865969034 | 0.000110649 |
| ENSG00000213417 | 1.227772566 | 0.205201606 | 2.363633041 | 0.018096728 |
| ENSG00000198874 | 1.692975225 | 0.526487469 | 2.975926678 | 0.002921047 |
| ENSG00000196406 | 1.227237178 | 0.204765446 | 2.328640682 | 0.019878109 |
| ENSG00000021852 | 1.274601879 | 0.242633878 | 2.01916071 | 0.043470518 |
| ENSG00000118231 | 1.513262502 | 0.414267917 | 3.461167268 | 0.000537839 |
| ENSG00000183695 | 1.272477501 | 0.240965788 | 2.11508317 | 0.034422859 |
| ENSG00000132849 | 1.561419524 | 0.445595359 | 2.58283409 | 0.009799243 |
| ENSG00000158717 | 0.669365477 | -0.401425065 | -2.252322613 | 0.024301892 |
| ENSG00000099985 | 1.436148368 | 0.361964786 | 2.024769657 | 0.042891022 |
| ENSG00000110077 | 0.679733746 | -0.386054107 | -1.996201608 | 0.045911983 |
| ENSG00000151164 | 0.658963192 | -0.417087601 | -2.171475366 | 0.029895257 |
| ENSG00000154007 | 1.341021571 | 0.29343169 | 2.409688252 | 0.015966157 |
| ENSG00000159069 | 0.576295629 | -0.551134505 | -2.481485378 | 0.013083608 |
| ENSG00000104897 | 0.578072141 | -0.548056606 | -2.763095456 | 0.005725602 |
| ENSG00000239732 | 1.39021539 | 0.329458692 | 2.002984708 | 0.04517893 |
| ENSG00000183648 | 0.558018614 | -0.583362959 | -2.436803022 | 0.014817749 |
| ENSG00000180708 | 1.388555784 | 0.328264203 | 3.560948718 | 0.000369517 |
| ENSG00000155090 | 1.747544926 | 0.558211904 | 2.484094549 | 0.012988132 |
| ENSG00000185010 | 0.675151807 | -0.392817714 | -2.044531172 | 0.040901101 |
| ENSG00000176978 | 0.676432366 | -0.390922813 | -2.057084327 | 0.039678115 |
| ENSG00000151414 | 1.50471742 | 0.40860512 | 2.145065681 | 0.031947596 |
| ENSG00000076554 | 1.516840019 | 0.416629236 | 2.111139704 | 0.034760306 |
| ENSG00000141977 | 0.502891502 | -0.687380833 | -1.975399454 | 0.048222835 |
| ENSG00000170965 | 1.464954262 | 0.381824021 | 2.570089202 | 0.010167233 |
| ENSG00000186063 | 1.947260293 | 0.666423407 | 3.056736926 | 0.002237606 |
| ENSG00000142207 | 1.601603615 | 0.471005387 | 2.405686259 | 0.016142121 |
| ENSG00000114115 | 0.679583402 | -0.386275313 | -2.201274246 | 0.027716615 |
| ENSG00000184076 | 0.593507779 | -0.521704958 | -2.55817075 | 0.010522441 |
| ENSG00000126934 | 0.591999749 | -0.524249068 | -2.646779086 | 0.008126242 |
| ENSG00000159618 | 0.698032099 | -0.35949019 | -1.977552478 | 0.047979215 |
| ENSG00000148908 | 0.653932091 | -0.42475177 | -2.251605397 | 0.02434722 |
| ENSG00000185339 | 0.534963349 | -0.625557042 | -2.886161141 | 0.003899724 |
| ENSG00000086598 | 1.632371573 | 0.49003391 | 2.505634749 | 0.012223181 |
| ENSG00000152219 | 0.641159483 | -0.444477049 | -2.334619959 | 0.019563283 |
| ENSG00000122122 | 0.692201911 | -0.367877587 | -1.989771663 | 0.046616094 |
| ENSG00000122390 | 0.654550245 | -0.423806928 | -2.205796042 | 0.027398284 |
| ENSG00000108788 | 1.581482578 | 0.458362748 | 2.304666877 | 0.021185237 |
| ENSG00000075884 | 0.624508385 | -0.470790523 | -1.972545883 | 0.048547324 |
| ENSG00000261884 | 0.62111187 | -0.476244068 | -2.49570678 | 0.012570646 |
| ENSG00000170262 | 1.390704077 | 0.329810149 | 3.271182533 | 0.001070988 |
| ENSG00000109193 | 0.347418279 | -1.057225811 | -2.654784964 | 0.007935898 |
| ENSG00000105583 | 0.559227555 | -0.581198814 | -2.635713734 | 0.008396053 |
| ENSG00000000005 | 1.513401732 | 0.41435992 | 4.361855389 | 1.29E-05 |
| ENSG00000178222 | 0.626808346 | -0.467114453 | -2.774271842 | 0.005532543 |
| ENSG00000152254 | 1.21827136 | 0.197432936 | 2.272013347 | 0.023085704 |
| ENSG00000205784 | 0.56469579 | -0.571468118 | -2.035022837 | 0.041848575 |
| ENSG00000255330 | 1.244193388 | 0.218487439 | 2.108893417 | 0.034953783 |
| ENSG00000198258 | 0.596818233 | -0.516142679 | -2.346234545 | 0.01896417 |
| ENSG00000214107 | 1.557528566 | 0.443100312 | 3.690028732 | 0.000224229 |
| ENSG00000216490 | 0.635178988 | -0.453848449 | -2.183630744 | 0.028989393 |
| ENSG00000102962 | 0.589129767 | -0.529108802 | -2.476361002 | 0.01327293 |
| ENSG00000135917 | 1.748677971 | 0.558860057 | 4.436721804 | 9.13E-06 |
| ENSG00000120693 | 1.394623471 | 0.332624466 | 2.595108077 | 0.009456118 |
| ENSG00000173085 | 0.711372867 | -0.34055856 | -1.968979107 | 0.04895549 |
| ENSG00000168843 | 1.379657366 | 0.321835183 | 3.599920612 | 0.000318314 |
| ENSG00000068308 | 0.633711773 | -0.456161044 | -2.355317472 | 0.018506887 |
| ENSG00000152969 | 0.552587535 | -0.593143423 | -2.114611931 | 0.034463036 |
| ENSG00000204677 | 0.590578452 | -0.526652796 | -1.996849225 | 0.045841564 |
| ENSG00000165502 | 0.670612787 | -0.399563378 | -2.040785157 | 0.041272187 |
| ENSG00000142530 | 0.641763487 | -0.443535444 | -2.049486075 | 0.040414608 |
| ENSG00000110328 | 0.660907469 | -0.414141435 | -2.175558852 | 0.029588263 |
| ENSG00000170160 | 1.361038616 | 0.308248097 | 2.75203127 | 0.005922687 |
| ENSG00000148386 | 1.411949941 | 0.344971686 | 3.369063724 | 0.00075424 |
| ENSG00000142444 | 0.648240222 | -0.433493938 | -2.221380149 | 0.026325224 |
| ENSG00000270149 | 1.397613545 | 0.334766171 | 1.963489214 | 0.049589357 |
| ENSG00000013725 | 0.531583038 | -0.631895861 | -2.903198967 | 0.003693719 |
| ENSG00000102575 | 0.723616418 | -0.323493836 | -1.980019718 | 0.047701313 |
| ENSG00000132824 | 1.399734558 | 0.336282617 | 2.020745059 | 0.043306163 |
| ENSG00000170348 | 1.435978353 | 0.361846396 | 1.991584414 | 0.046416675 |
| ENSG00000130560 | 0.642266025 | -0.442752692 | -2.448297251 | 0.014353319 |
| ENSG00000169442 | 0.688492987 | -0.373250147 | -2.158673685 | 0.030875492 |
| ENSG00000167208 | 0.620023608 | -0.477997725 | -2.361280652 | 0.018211942 |
| ENSG00000100376 | 0.62200692 | -0.474804061 | -2.1322853 | 0.0329834 |
| ENSG00000267335 | 1.36186879 | 0.308857867 | 2.922068165 | 0.003477154 |
| ENSG00000172269 | 1.649285474 | 0.500342148 | 2.658689832 | 0.007844514 |
| ENSG00000153214 | 1.496106852 | 0.402866302 | 2.029249146 | 0.04243292 |
| ENSG00000187735 | 1.56367206 | 0.44703694 | 2.388955277 | 0.016896359 |
| ENSG00000078900 | 0.687335612 | -0.374932588 | -2.003180347 | 0.045157934 |
| ENSG00000221983 | 0.624466784 | -0.470857139 | -1.970775191 | 0.048749596 |
| ENSG00000164961 | 1.806858148 | 0.591589507 | 2.849904236 | 0.004373239 |
| ENSG00000073861 | 0.61166057 | -0.491577774 | -2.039952937 | 0.041355013 |
| ENSG00000147202 | 1.370981766 | 0.315527101 | 2.058247759 | 0.039566356 |
| ENSG00000066468 | 0.658085473 | -0.418420457 | -2.223392939 | 0.026189315 |
| ENSG00000196872 | 0.658895653 | -0.417190098 | -2.22893824 | 0.025818014 |
| ENSG00000077984 | 0.645745299 | -0.437350127 | -2.401889329 | 0.016310642 |
| ENSG00000188452 | 0.645016462 | -0.43847944 | -2.165355103 | 0.030360501 |
| ENSG00000163923 | 0.70829772 | -0.344890766 | -2.149745087 | 0.031575384 |
| ENSG00000169908 | 1.585797072 | 0.461087166 | 2.243149096 | 0.024887202 |
| ENSG00000049249 | 0.640474833 | -0.445545452 | -2.004966257 | 0.044966654 |
| ENSG00000266302 | 1.331178348 | 0.286064526 | 2.734859816 | 0.006240685 |
| ENSG00000146416 | 1.597429007 | 0.468395466 | 2.702247935 | 0.006887238 |
| ENSG00000172236 | 0.64953522 | -0.431498218 | -2.174756496 | 0.029648369 |
| ENSG00000116406 | 1.461060818 | 0.379162759 | 2.148828403 | 0.031648005 |
| ENSG00000113263 | 0.617852296 | -0.481505853 | -2.090911845 | 0.036535967 |
| ENSG00000277277 | 1.251382641 | 0.224249053 | 2.065655539 | 0.038861016 |
| ENSG00000106123 | 0.59994176 | -0.510922695 | -2.736080604 | 0.006217579 |
| ENSG00000133059 | 1.468514041 | 0.384251033 | 2.318982574 | 0.020395981 |
| ENSG00000180233 | 1.5065282 | 0.409807798 | 2.275384678 | 0.022882864 |
| ENSG00000146587 | 1.488242617 | 0.397595972 | 2.199529781 | 0.027840274 |
| ENSG00000146707 | 0.568229085 | -0.565230623 | -2.702513656 | 0.006881736 |
| ENSG00000123685 | 0.539650268 | -0.616834002 | -2.627912887 | 0.008591051 |

Table S3. The significantly amplified genes on each segment.

| cytoband | q value | residual q value | wide peak boundaries | genes in wide peak |
| --- | --- | --- | --- | --- |
| 3q26.31 | 1.37E-42 | 1.37E-42 | chr3:172196373-172326741 | FNDC3B |
| 11q22.1 | 3.91E-40 | 1.39E-34 | chr11:101807855-102392541 | BIRC2  BIRC3  YAP1  CEP126  C11orf70  ANGPTL5 |
| 17q12 | 5.62E-12 | 1.73E-10 | chr17:39698255-39743434 | ERBB2  GRB7  MIEN1  MIR4728 |
| 8q24.21 | 7.70E-09 | 7.70E-09 | chr8:127727004-127756963 | MYC  CASC11 |
| 13q22.1 | 2.97E-07 | 2.97E-07 | chr13:73374554-73383971 | [LINC00392] |
| 20q11.21 | 3.84E-07 | 3.84E-07 | chr20:31610271-31739285 | BCL2L1  TPX2  COX4I2  ABALON |
| 19q13.13 | 6.70E-07 | 6.70E-07 | chr19:37964020-37982844 | SIPA1L3 |
| 16p13.13 | 1.72E-06 | 1.72E-06 | chr16:11792211-11822504 | ZC3H7A  BCAR4 |
| 9p24.1 | 1.17E-05 | 1.17E-05 | chr9:5302096-5560486 | RLN1  RLN2  CD274  PLGRKT  PDCD1LG2 |
| 5p15.33 | 0.00028032 | 0.00028 | chr5:1-1287275 | SDHA  SLC9A3  TERT  TRIP13  PDCD6  SLC12A7  TPPP  EXOC3  PP7080  CEP72  AHRR  BRD9  ZDHHC11  NKD2  EXOC3-AS1  CCDC127  PLEKHG4B  SLC6A19  SLC6A18  LRRC14B  LOC100288152  LOC100506688  MIR4456  MIR4635  LOC100996325  CTD-3080P12.3  HRAT5 |
| 11q13.3 | 5.19E-07 | 0.000784 | chr11:69884021-70333741 | PPFIA1  FADD  ANO1  ANO1-AS2  MIR548K  LOC101928443 |
| 6p21.33 | 0.0010295 | 0.00103 | chr6:30509500-30626018 | ABCF1  GNL1  PPP1R10  MRPS18B  PRR3  MIR877 |
| 17q25.1 | 0.00019411 | 0.001458 | chr17:75840363-76039362 | ACOX1  CDK3  EVPL  SRP68  WBP2  MRPL38  FBF1  TRIM47  TRIM65  UNC13D  TEN1  TEN1-CDK3 |
| Xq28 | 0.0020048 | 0.002005 | chrX:149480925-156040895 | ABCD1  ARHGAP4  ATP2B3  ATP6AP1  AVPR2  BGN  CETN2  CLIC2  CNGA2  TEX28  DKC1  DNASE1L1  DUSP9  EMD  F8  FLNA  G6PD  GABRA3  GABRE  OPN1MW  GDI1  HCFC1  HMGB3  IDH3G  IDS  IL9R  IRAK1  L1CAM  MAGEA1  MAGEA2  MAGEA3  MAGEA4  MAGEA5  MAGEA6  MAGEA8  MAGEA9  MAGEA10  MAGEA11  MAGEA12  MECP2  MPP1  MTCP1  MTM1  PLXNB3  OPN1LW  RENBP  RPL10  SLC6A8  SSR4  VAMP7  TAZ  VBP1  ZNF185  NAA10  F8A1  UBL4A  TMEM187  LAGE3  SLC10A3  TKTL1  IKBKG  MTMR1  FAM50A  GPR50  MAMLD1  BCAP31  SPRY3  ZNF275  TREX2  SRPK3  SNORA70  PNMA3  CTAG2  NSDHL  TMLHE  PLXNA3  HAUS7  GABRQ  PDZD4  FAM3A  FUNDC2  PRRG3  BRCC3  CD99L2  TMEM185A  PNMA6A  FATE1  CXorf40A  FAM58A  PNMA5  RAB39B  PASD1  GAB3  PNCK  ZFP92  CSAG1  CH17-340M24.3  VMA21  CTAG1A  MAGEA2B  CSAG3  MIR105-1  MIR105-2  MIR224  H2AFB2  H2AFB1  F8A2  CXorf40B  MIR452  SNORA36A  SNORA56  DDX11L16  MAGEA9B  OPN1MW2  MIR767  WASIR1  GPR50-AS1  HSFX2  CSAG4  LINC00893  SMIM9  FAM223A  CMC4  LINC00894  MIR1184-1  MIR718  MIR2114  MIR3202-2  MIR4330  MIR1184-3  MIR1184-2  MIR3202-1  HSFX1  MAGEA10-MAGEA5  MIR664B  HCFC1-AS1  LCA10  OPN1MW3  LINC00850  MAGEA8-AS1  LOC101927830  LOC101928917  MIR6858  LOC105373368  LOC105373378  LOC105373383  LOC105377213 |
| 1q21.3 | 0.0051613 | 0.005161 | chr1:150377293-152828758 | ARNT  CTSK  CTSS  ECM1  ENSA  FLG  MCL1  PI4KB  PSMB4  PSMD4  RFX5  RORC  S100A10  S100A11  VPS72  TCHH  TUFT1  PIP5K1A  ANXA9  SELENBP1  SETDB1  SEMA6C  MLLT11  TDRKH  CELF3  POGZ  RPRD2  LCE2B  TMOD4  CERS2  CRNN  OAZ3  ADAMTSL4  CRCT1  C1orf56  GOLPH3L  FAM63A  CDC42SE1  CGN  ZNF687  PRUNE1  MRPL9  SCNM1  TNFAIP8L2  TARS2  SNX27  HORMAD1  LCE3D  THEM4  GABPB2  TCHHL1  RPTN  BNIPL  LCE4A  LCE5A  RIIAD1  THEM5  LINGO4  FLG-AS1  LCE1A  LCE1B  LCE1C  LCE1D  LCE1E  LCE1F  LCE2A  LCE2C  LCE2D  LCE3A  LCE3B  LCE3C  LCE3E  LYSMD1  HRNR  FLG2  NBPF18P  KPRP  ADAMTSL4-AS1  MIR554  C1orf68  LOC100131107  LOC100132111  C2CD4D  MIR4257  LOC100507670  TNFAIP8L2-SCNM1  FALEC  GBAT2  MIR6878 |
| 7p11.2 | 0.01188 | 0.01188 | chr7:54974607-55023139 | EGFR |
| 15q26.2 | 0.044131 | 0.044131 | chr15:74559528-101991189 | ACAN  ALDH1A3  ANPEP  BCL2A1  BLM  BNC1  CHD2  CHRNA3  CHRNA5  CHRNB4  CLK3  CRABP1  CSK  CSPG4  CTSH  CYP1A1  CYP1A2  ETFA  FAH  FES  IDH2  IDH3A  IGF1R  IL16  IREB2  ISG20  MAN2A2  MAN2C1  MEF2A  MFGE8  MPI  NMB  NTRK3  FURIN  PCSK6  PDE8A  PLIN1  POLG  PSMA4  PTPN9  RASGRF1  RCN2  RLBP1  RPS17  SH3GL3  SNRPA1  NR2F2  HSP90B2P  TYRO3P  AP3B2  ST8SIA2  PEX11A  IQGAP1  PSTPIP1  PRC1  SLC28A1  COX5A  HOMER2  ZNF592  SV2B  ARNT2  SCAMP2  SNUPN  TSPAN3  AP3S2  HMG20A  SEMA4B  CIB2  CIB1  MTHFS  ARID3B  MORF4L1  ABHD2  ADAMTS7  AKAP13  CHSY1  TBC1D2B  MESDC2  ACSBG1  KIAA1024  SYNM  TMED3  SEC11A  GABARAPL3  SIN3A  ULK3  FBXO22  VPS33B  MRPL46  OR4F4  SLCO3A1  SCAPER  HDGFRP3  NGRN  RHCG  BTBD1  TM6SF1  ZFAND6  SCAND2P  RPP25  COMMD4  ZSCAN2  DET1  LINS1  FANCI  IMP3  DNAJA4  MCTP2  VIMP  MESP1  UNC45A  C15orf39  RGMA  WDR93  FAM219B  ADAMTSL3  CEMIP  ALPK3  ABHD17C  MESDC1  PPCDC  KLHL25  CPEB1  AEN  CRTC3  ISL2  TTC23  MRPS11  EFL1  NEIL1  LRRK1  LMAN1L  PEAK1  EDC3  GOLGA2P10  TM2D3  WDR61  STARD5  LINC00597  FAM103A1  MEX3B  LINGO1  WDR73  TICRR  RCCD1  LOC91450  ARRDC4  LINC00923  UBE2Q2  C15orf40  TARSL2  LRRC28  TMEM266  AGBL1  HYKK  WHAMM  FSD2  ASB7  LYSMD4  PGPEP1L  LINC00924  C15orf32  HAPLN3  MESP2  SPATA8  NRG4  LINC00052  CFAP161  ODF3L1  ADAMTS17  SCAMP5  DNM1P46  CERS3  LINGO1-AS1  MIR9-3HG  SNX33  LINC01579  ST20-AS1  LINC00927  CPEB1-AS1  ACTG1P17  SAXO2  NTRK3-AS1  LINC00928  FAM169B  LOC338963  TMC3  ZNF774  ARPIN  GOLGA6L5P  KIF7  ZNF710  HDDC3  WASH3P  GOLGA2P7  UBE2Q2P1  SPATA41  ANKRD34C  GDPGP1  OR4F6  OR4F15  OR4F13P  ADAMTS7P1  ST20  FAM174B  LINC01197  LOC400464  MIR184  MIR7-2  MIR9-3  GOLGA6L9  DNM1P41  LOC440300  TTLL13P  LOC440311  PRKXP1  CPLX3  GOLGA6L17P  LOC642423  GOLGA6L4  NR2F2-AS1  LOC645752  SH2D7  LOC646938  GOLGA6L10  EFTUD1P1  GOLGA6C  GOLGA6D  SCARNA15  FBXO22-AS1  MIR549A  MIR631  LOC727751  AGBL1-AS1  ASB9P1  ANKRD34C-AS1  FAM138E  LOC100128108  DNM1P35  GOLGA6L3  UBE2Q2P2  LINC00930  DDX11L9  MIR1276  MIR1179  MIR1469  MIR1302-2  MIR1302-9  MIR1302-10  MIR3174  MIR1302-11  MIR3175  MIR4313  MIR3713  SNHG21  UBE2Q2L  LINC00933  PRC1-AS1  LINC01578  LOC100507472  C15orf38-AP3S2  ST20-MTHFS  MIR4514  MIR4513  MIR3529  MIR4515  MIR4714  SPATA8-AS1  MIR5009  MIR5572  MIR5094  MIR548AP  LINC01314  CRTC3-AS1  LOC101926911  CRAT37  LINC01581  LINC01580  LOC101927153  LOC101927286  LOC101927310  LINC01582  LOC101927751  LOC101929439  LOC101929457  LINGO1-AS2  LOC101929586  TMC3-AS1  LOC101929679  LINC01583  LINC01584  LINC01586  LINC01585  MIR6882  MIR7706  MIR6859-2  MIR6859-3  MIR6859-1  MIR6766  CERS3-AS1  LOC102723335  LOC102724034  LOC102724452  LOC103171574  IRAIN  LUNAR1  LOC104613533  LOC105370954  PCSK6-AS1  LOC105376731 |

Table S4. The significantly deleted genes in each segment.

| cytoband | q value | residual q value | wide peak boundaries | genes in wide peak |
| --- | --- | --- | --- | --- |
| 11q24.2 | 9.11E-26 | 9.11E-26 | chr11:110440519-135086622 | | ACRV1 | | --- | | APLP2 | | APOA1 | | APOA4 | | APOC3 | | ARCN1 | | FXYD2 | | CXCR5 | | CBL | | CD3D | | CD3E | | CD3G | | CHEK1 | | CRYAB | | DDX6 | | DLAT | | DPAGT1 | | DRD2 | | ETS1 | | FDX1 | | FLI1 | | SLC37A4 | | GRIK4 | | H2AFX | | HMBS | | HSPA8 | | HSPB2 | | HTR3A | | IL10RA | | IL18 | | STT3A | | KCNJ1 | | KCNJ5 | | VWA5A | | MCAM | | KMT2A | | NCAM1 | | NFRKB | | NNMT | | NRGN | | OPCML | | PAFAH1B2 | | POU2AF1 | | PPP2R1B | | PTS | | NECTIN1 | | RPS25 | | SC5D | | SCN2B | | SCN4B | | SDHD | | ST3GAL4 | | SORL1 | | SRPRA | | ST14 | | TAGLN | | TECTA | | THY1 | | UPK2 | | ZBTB16 | | ZNF202 | | BARX2 | | ZPR1 | | USP2 | | PCSK7 | | HTR3B | | ZW10 | | UBE4A | | EI24 | | FEZ1 | | ARHGAP32 | | C2CD2L | | RBM7 | | MPZL2 | | HYOU1 | | ATP5L | | ADAMTS8 | | TREH | | CEP164 | | IGSF9B | | PHLDB1 | | SIK2 | | NCAPD3 | | ARHGEF12 | | SIK3 | | VSIG2 | | BACE1 | | TRIM29 | | CADM1 | | POU2F3 | | HINFP | | REXO2 | | OR8G2 | | OR8B8 | | OR8G1 | | TIMM8B | | OR8B2 | | ACAD8 | | B3GAT1 | | DCPS | | ZBTB44 | | THYN1 | | DDX25 | | NTM | | CDON | | SIDT2 | | TRAPPC4 | | SPA17 | | FXYD6 | | SIAE | | C11orf71 | | ROBO4 | | BTG4 | | NXPE4 | | TTC12 | | C11orf57 | | FOXRED1 | | SCN3B | | VPS11 | | TEX12 | | CRTAM | | TMPRSS4 | | IFT46 | | PRDM10 | | DSCAML1 | | GRAMD1B | | ARHGAP20 | | USP28 | | PKNOX2 | | TP53AIP1 | | ABCG4 | | ROBO3 | | C11orf1 | | RNF26 | | FAM118B | | NLRX1 | | MSANTD2 | | ALG9 | | CLMP | | PDZD3 | | C11orf63 | | CCDC15 | | TMPRSS5 | | PUS3 | | JAM3 | | BCO2 | | TMPRSS13 | | KIRREL3 | | BUD13 | | TMEM25 | | RPUSD4 | | TBRG1 | | UBASH3B | | SNORD14C | | SNORD14D | | SNORD14E | | DIXDC1 | | GLB1L2 | | ESAM | | FDXACB1 | | C11orf52 | | VPS26B | | GLB1L3 | | TIRAP | | C1QTNF5 | | PANX3 | | APOA5 | | TMEM45B | | COLCA2 | | PIH1D2 | | NXPE1 | | NXPE2 | | JAML | | LAYN | | TTC36 | | PATE1 | | ADAMTS15 | | MPZL3 | | C11orf45 | | HYLS1 | | TMEM218 | | SLC37A2 | | OR8B12 | | OR8G5 | | OR10G8 | | OR10G9 | | OR10S1 | | OR6T1 | | OR4D5 | | TBCEL | | TMEM136 | | SPATA19 | | HEPACAM | | OAF | | ANKK1 | | RNF214 | | LOC283140 | | LINC00900 | | BCL9L | | FOXR1 | | CCDC153 | | OR8D1 | | OR8D2 | | OR8B4 | | KIRREL3-AS3 | | C11orf44 | | MIR4697HG | | LOC283177 | | CCDC84 | | TMEM225 | | OR8D4 | | C11orf53 | | LOC341056 | | PLET1 | | LOC387810 | | BSX | | OR6X1 | | OR6M1 | | OR10G4 | | OR10G7 | | OR8B3 | | OR8A1 | | COLCA1 | | C11orf88 | | MIR100HG | | PATE2 | | PATE4 | | ST3GAL4-AS1 | | SNX19 | | LOC403312 | | MIRLET7A2 | | MIR100 | | MIR125B1 | | MIR34B | | MIR34C | | BLID | | LINC00167 | | HEPN1 | | CLDN25 | | LOC646522 | | LOC649133 | | RPL23AP64 | | LOC100128239 | | LOC100131626 | | LOC100132078 | | LOC100132686 | | PATE3 | | NCAM1-AS1 | | BACE1-AS | | MIR4301 | | MIR3167 | | USP2-AS1 | | MIR3656 | | LOC100507283 | | SENCR | | LOC100507431 | | LOC100507548 | | TMPRSS4-AS1 | | HSPB2-C11orf52 | | FXYD6-FXYD2 | | MIR4697 | | MIR4493 | | MIR4491 | | MIR4492 | | LOC100652768 | | KIRREL3-AS2 | | NTM-IT | | LOC101928823 | | LOC101928847 | | LOC101928940 | | LOC101928985 | | LOC101929011 | | LOC101929089 | | LOC101929208 | | LOC101929227 | | LOC101929340 | | LOC101929427 | | LOC101929473 | | LOC101929497 | | LOC101929517 | | LOC101929538 | | LINC01395 | | NTM-AS1 | | LOC101929653 | | MIR6756 | | MIR7641-2 | | MIR6090 | | MIR6716 | | MIR8052 | | LOC102724301 | | LOC103611081 | | PKNOX2-AS1 | | APOA1-AS | | LOC105369507 | | LOC105369509 | | LOC105369532 | | STT3A-AS1 | |
| 2q37.1 | 1.03E-23 | 1.18E-19 | chr2:217862073-242193529 | | hsa-mir-1244-1 | | --- | | AAMP | | AGXT | | ALPI | | ALPP | | ALPPL2 | | KIF1A | | BCS1L | | BOK | | CHRND | | CHRNG | | COL4A3 | | COL4A4 | | COL6A3 | | CRYBA2 | | CYP27A1 | | DES | | DTYMK | | EPHA4 | | ACSL3 | | GBX2 | | GPC1 | | GPR35 | | HDLBP | | AGFG1 | | DNAJB2 | | HTR2B | | SP110 | | IHH | | CXCR1 | | CXCR2 | | CXCR2P1 | | INHA | | INPP5D | | IRS1 | | KCNJ13 | | NCL | | NDUFA10 | | 2-Sep | | NEU2 | | NPPC | | PAX3 | | PDCD1 | | PDE6D | | SERPINE2 | | PPP1R7 | | PSMD1 | | PTMA | | PTPRN | | SNORD20 | | SAG | | CCL20 | | SLC4A3 | | SLC11A1 | | SP100 | | SPP2 | | TNS1 | | TUBA4A | | VIL1 | | WNT6 | | ZNF142 | | SCG2 | | CUL3 | | DGKD | | STK16 | | PER2 | | CDK5R2 | | CNOT9 | | LRRFIP1 | | GPR55 | | TRIP12 | | ECEL1 | | EIF4E2 | | TTLL4 | | HDAC4 | | FARP2 | | FARSB | | ABCB6 | | ARPC2 | | ARL4C | | RAMP1 | | SPEG | | NMUR1 | | STK25 | | COPS8 | | CAPN10 | | SP140 | | PASK | | ATG4B | | OBSL1 | | DNPEP | | SH3BP4 | | KCNE4 | | NGEF | | SNORD82 | | PNKD | | SNED1 | | GIGYF2 | | TRAF3IP1 | | CNPPD1 | | STK36 | | GMPPA | | ANO7 | | PRLH | | THAP4 | | ANKMY1 | | SCLY | | ASB1 | | CAB39 | | PRKAG3 | | UGT1A10 | | UGT1A8 | | UGT1A7 | | UGT1A6 | | UGT1A5 | | UGT1A9 | | UGT1A4 | | UGT1A1 | | UGT1A3 | | FEV | | PID1 | | ATG16L1 | | ANKZF1 | | USP40 | | HJURP | | HES6 | | ASIC4 | | DOCK10 | | C2orf83 | | MFF | | ACKR3 | | RNPEPL1 | | WDFY1 | | NYAP2 | | USP37 | | CTDSP1 | | GAL3ST2 | | TMBIM1 | | RAB17 | | RNF25 | | COPS7B | | MRPL44 | | TRPM8 | | ATG9A | | MLPH | | FAM134A | | GLB1L | | CHPF | | IQCA1 | | NHEJ1 | | FAM124B | | TM4SF20 | | C2orf54 | | TUBA4B | | ARMC9 | | EFHD1 | | SPHKAP | | WNT10A | | SLC19A3 | | ILKAP | | ITM2C | | RHBDD1 | | ING5 | | PLCD4 | | MGC16025 | | DNER | | B3GNT7 | | SP140L | | LOC93463 | | STK11IP | | MOGAT1 | | AGAP1 | | TWIST2 | | DIS3L2 | | NEU4 | | AP1S3 | | SGPP2 | | SPATA3 | | TMEM198 | | ZFAND2B | | FBXO36 | | MTERF4 | | UBE2F | | OTOS | | COPS9 | | OR6B3 | | LOC150935 | | LINC01107 | | LOC151174 | | ERFE | | CCDC140 | | SLC23A3 | | LINC00608 | | GPBAR1 | | SLC16A14 | | LOC151475 | | LINC00471 | | LOC151484 | | MSL3P1 | | DAW1 | | C2orf57 | | TIGD1 | | LOC200772 | | CFAP65 | | C2orf72 | | RTP5 | | LOC285095 | | RUFY4 | | DUSP28 | | MROH2A | | ESPNL | | ECEL1P2 | | SPATA3-AS1 | | CATIP | | RBM44 | | AQP12A | | KLHL30 | | RESP18 | | C2orf82 | | OR6B2 | | ASB18 | | FLJ43879 | | MIR149 | | MIR153-1 | | MIR26B | | DNAJB3 | | LOC440934 | | MIR375 | | LOC643387 | | LOC646736 | | PRSS56 | | AQP12B | | SNORA75 | | LOC654841 | | SCARNA6 | | SCARNA5 | | MIR562 | | D2HGDH | | LOC728323 | | LOC100129175 | | PP14571 | | LOC100286922 | | MIR1471 | | MIR1244-1 | | BOK-AS1 | | MIR1244-3 | | MIR1244-2 | | MIR3133 | | MIR3131 | | MIR4268 | | MIR3132 | | MIR4269 | | AGAP1-IT1 | | UBE2F-SCLY | | MIR4439 | | MIR4777 | | MIR2467 | | MIR4440 | | MIR4786 | | MIR4441 | | MIR5001 | | MIR5702 | | MIR5703 | | LOC100996693 | | CAPN10-AS1 | | LINC01237 | | LOC101928111 | | CATIP-AS1 | | LINC01494 | | LOC101928881 | | MIR6513 | | MIR6809 | | MIR6811 | | MIR6810 | | LOC102723927 | | MIR9500 | | CATIP-AS2 | | LOC105373878 | | LINC01173 | |
| 19p13.3 | 2.06E-12 | 2.06E-12 | chr19:818798-939776 | | AZU1 | | --- | | CFD | | ARID3A | | ELANE | | PRTN3 | | MED16 | | RNU6-1 | | PLPPR3 | | KISS1R | | R3HDM4 | | RNU6-7 | | RNU6-2 | |
| 8p23.3 | 5.82E-12 | 5.82E-12 | chr8:1-2175929 | | CLN8 | | --- | | MYOM2 | | DLGAP2 | | ARHGEF10 | | KBTBD11 | | FBXO25 | | FAM87A | | TDRP | | ERICH1 | | ZNF596 | | LOC286083 | | LOC401442 | | OR4F21 | | ERICH1-AS1 | | RPL23AP53 | | MIR596 | | MIR3674 | | DLGAP2-AS1 | | LOC101927752 | | LOC101928058 | | MIR7160 | | KBTBD11-OT1 | |
| 13q14.2 | 8.97E-12 | 8.97E-12 | chr13:40083516-48589447 | | RCBTB2 | | --- | | CPB2 | | ELF1 | | ESD | | FOXO1 | | GTF2F2 | | HTR2A | | LCP1 | | RB1 | | TPT1 | | TNFSF11 | | SUCLA2 | | TSC22D1 | | ITM2B | | MTRF1 | | LPAR6 | | SLC25A15 | | MRPS31 | | WBP4 | | AKAP11 | | VWA8 | | ZC3H13 | | LRCH1 | | NUFIP1 | | RGCC | | MED4 | | DNAJC15 | | ENOX1 | | NUDT15 | | GPALPP1 | | SMIM2 | | NAA16 | | RUBCNL | | COG3 | | KBTBD7 | | KBTBD6 | | EPSTI1 | | LINC00284 | | FAM216B | | LACC1 | | LINC00330 | | DGKH | | CCDC122 | | ERICH6B | | SPERT | | LRRC63 | | SLC25A30 | | SUGT1P3 | | SIAH3 | | KCTD4 | | SERP2 | | LINC00548 | | TUSC8 | | TSC22D1-AS1 | | LINC00598 | | SNORA31 | | MIR621 | | LINC00462 | | TPT1-AS1 | | MIR320D1 | | MIR3168 | | OR7E37P | | VWA8-AS1 | | CPB2-AS1 | | TPTE2P5 | | MIR5006 | | LINC00562 | | LINC00563 | | LINC00441 | | MED4-AS1 | | HTR2A-AS1 | | LINC00332 | | ENOX1-AS2 | | LINC00400 | | SLC25A30-AS1 | | SMIM2-IT1 | | LOC101929140 | | SMIM2-AS1 | | LOC101929259 | | LINC01198 | | MIR8079 | | LINC01050 | | LINC01055 | | LINC00428 | | LOC105370177 | | LINC00390 | |
| 3p14.2 | 2.89E-07 | 2.89E-07 | chr3:61103474-61183826 | FHIT |
| 4q35.2 | 7.52E-07 | 7.52E-07 | chr4:186319112-186707985 | | FAT1 | | --- | | MTNR1A | | F11-AS1 | |
| 17p12 | 3.21E-05 | 3.21E-05 | chr17:12128413-12209846 | MAP2K4 |
| 6q26 | 0.000117 | 0.000117 | chr6:158154019-164391781 | | ACAT2 | | --- | | IGF2R | | LPA | | MAS1 | | MAP3K4 | | PARK2 | | PLG | | SLC22A1 | | SLC22A3 | | SLC22A2 | | SOD2 | | TCP1 | | DYNLT1 | | EZR | | QKI | | WTAP | | MRPL18 | | AGPAT4 | | TULP4 | | TMEM181 | | AGPAT4-IT1 | | LPAL2 | | RSPH3 | | FNDC1 | | SERAC1 | | SYTL3 | | TAGAP | | PACRG | | PNLDC1 | | OSTCP1 | | PACRG-AS1 | | DKFZp451B082 | | GTF2H5 | | SNORA20 | | SNORA29 | | LOC729603 | | PACRG-AS3 | | LOC100129518 | | C6orf99 | | AIRN | | MIR3918 | | CAHM | | EZR-AS1 | | LOC101929122 | | PACRG-AS2 | | MIR7161 | | LOC102724053 | | LOC102724152 | | LOC105378098 | |
| 2q22.1 | 4.14E-10 | 0.000503 | chr2:141069794-141084429 | LRP1B |
| 20p12.1 | 0.000547 | 0.000547 | chr20:14710477-15185349 | | MACROD2 | | --- | | MACROD2-AS1 | |
| 18q21.2 | 0.001019 | 0.001019 | chr18:51045003-51090285 | | SMAD4 | | --- | |  | |
| 4p15.31 | 0.006856 | 0.006856 | chr4:1-43322137 | | ADD1 | | --- | | ADRA2C | | APBB2 | | RHOH | | ATP5I | | NKX3-2 | | BST1 | | CCKAR | | CD38 | | CRMP1 | | CTBP1 | | DGKQ | | DHX15 | | DRD5 | | EVC | | FGFR3 | | GAK | | GRK4 | | HTT | | HGFAC | | UBE2K | | HMX1 | | IDUA | | RBPJ | | LETM1 | | LRPAP1 | | MSX1 | | MYL5 | | PCDH7 | | PDE6B | | PPP2R2C | | QDPR | | RFC1 | | RGS12 | | RNF4 | | RPL9 | | S100P | | SH3BP2 | | SOD3 | | TLR1 | | UCHL1 | | UGDH | | WFS1 | | WHSC1 | | NELFA | | ZNF141 | | SLBP | | ACOX3 | | CPZ | | NOP14 | | FAM193A | | PROM1 | | PHOX2B | | LDB2 | | SLIT2 | | RAB28 | | KIAA0232 | | WDR1 | | HS3ST1 | | FGFBP1 | | LINC01587 | | MFSD10 | | MAEA | | TLR6 | | PCGF3 | | ATP8A1 | | SPON2 | | TACC3 | | SLC30A9 | | SLC34A2 | | MXD4 | | PTTG2 | | CPLX1 | | SLC26A1 | | PPARGC1A | | LIAS | | LIMCH1 | | TBC1D1 | | SEL1L3 | | PDS5A | | MAN2B2 | | FBXL5 | | NSG1 | | FAM184B | | GPR78 | | ZCCHC4 | | ANAPC4 | | LAP3 | | KLHL5 | | SEPSECS | | KLF3 | | STX18 | | FGFRL1 | | CYTL1 | | SH3TC1 | | RBM47 | | NKX1-1 | | PIGG | | DCAF16 | | TMEM33 | | LGI2 | | PGM2 | | C4orf19 | | TBC1D19 | | PI4K2B | | BLOC1S4 | | STK32B | | CHRNA9 | | LYAR | | N4BP2 | | SLC2A9 | | NWD2 | | TBC1D14 | | SORCS2 | | CC2D2A | | STIM2 | | UVSSA | | WDR19 | | ZFYVE28 | | GBA3 | | AFAP1 | | NCAPG | | TNIP2 | | HAUS3 | | KLF3-AS1 | | NSUN7 | | ABCA11P | | TMEM156 | | GRPEL1 | | MED28 | | KCNIP4 | | TLR10 | | FGFBP2 | | MFSD7 | | TMEM175 | | ABLIM2 | | AFAP1-AS1 | | TMEM128 | | ZNF518B | | CCDC149 | | CTBP1-AS2 | | TMEM129 | | FAM114A1 | | MRFAP1 | | LOC93622 | | TADA2B | | HTRA3 | | C1QTNF7 | | MRFAP1L1 | | CLNK | | ARAP2 | | CPEB2 | | EVC2 | | PACRGL | | OTOP1 | | SHISA3 | | ZNF595 | | LINC01085 | | JAKMIP1 | | KLB | | FAM53A | | TRMT44 | | ADGRA3 | | ZBTB49 | | ZNF721 | | LINC00504 | | SMIM14 | | TAPT1 | | TAPT1-AS1 | | LCORL | | ZNF718 | | CCDC96 | | BOD1L1 | | DCAF4L1 | | CTBP1-AS | | CRIPAK | | LOC285484 | | DOK7 | | LINC00955 | | RNF212 | | SEPSECS-AS1 | | LINC01097 | | LINC01096 | | FAM200B | | NOP14-AS1 | | NAT8L | | LOC344967 | | MSANTD1 | | FAM86EP | | POLN | | KCNIP4-IT1 | | LOC389199 | | SMIM20 | | BEND4 | | GRXCR1 | | USP17L6P | | USP17L9P | | C4orf48 | | DTHD1 | | LOC401127 | | CFAP99 | | MIR218-1 | | MIR95 | | LOC439933 | | CPEB2-AS1 | | ZNF876P | | DEFB131 | | CLRN2 | | LOC650293 | | ZNF732 | | SCARNA22 | | MIR571 | | MIR572 | | MIR573 | | MIR574 | | USP17L24 | | USP17L25 | | USP17L26 | | USP17L27 | | USP17L28 | | USP17L29 | | USP17L30 | | FLJ36777 | | RELL1 | | PSAPL1 | | MIR943 | | LOC100129917 | | LOC100129931 | | LOC100130872 | | LOC100133461 | | USP17L10 | | USP17L11 | | USP17L12 | | USP17L13 | | USP17L17 | | USP17L18 | | USP17L19 | | USP17L20 | | USP17L15 | | MIR548I2 | | MIR1255B1 | | TMED11P | | MIR4274 | | MIR4275 | | MIR3138 | | SLIT2-IT1 | | LOC100505912 | | STX18-AS1 | | LOC100508631 | | MIR378D1 | | MIR4802 | | MIR4800 | | MIR4801 | | MIR4798 | | HTT-AS | | MIR5091 | | MIR5591 | | UGDH-AS1 | | LOC101060498 | | UCHL1-AS1 | | LINC00682 | | LOC101927363 | | LOC101928279 | | LOC101928306 | | LOC101928622 | | LINC01258 | | LOC101929019 | | LINC01182 | | LOC101929095 | | LOC101929123 | | LOC101929161 | | LOC101929199 | | MIR7978 | | LOC102723778 | | LOC102723828 | | LINC01396 | | STX18-IT1 | | LOC105374344 | | LOC105374366 | | LOC105374428 | | LOC105374516 | | LOC105374546 | | LOC105377651 | |
| 10q23.31 | 0.007708 | 0.007708 | chr10:87981746-88191270 | [PTEN] |

Table S5. Univariate and multivariate Cox regression analysis to identify prognostic factors in training datasets.

| **Variables** | **Univariate analysis** | | | **Multivariable analysis** | | |
| --- | --- | --- | --- | --- | --- | --- |
| **HR** | **95%CI of HR** | **P value** | **HR** | **95%CI of HR** | **P value** |
| **TCGA training datasets** | | | | | | |
| 6-gene risk score | | | | | | |
| Low risk group | 1(reference) |  |  | 1(reference) |  |  |
| High risk group | 2.72 | 1.99- 3.71 | 2.550E-10 | 2.89 | 1.20-6.94 | 0.018 |
| Age | 1.03 | 1-1.05 | 0.050 | 1.05 | 0.95-1.14 | 0.348 |
| Grade 1 | 1(reference) |  |  | 1(reference) |  |  |
| Grade 2 | 1.10 | 0.14-8.37 | 0.93 | 1.00 | 0.23-4.31 | 0.9954 |
| Grade 3 | 0.68 | 0.084-5.49 | 0.72 | 0.39 | 0.08-1.78 | 0.2273 |
| Pathologic T 1 | 1(reference) |  |  | 1(reference) |  |  |
| Pathologic T 2 | 1.48 | 0.48-4.51 | 0.487 | 0.25 | 0.0295-2.072 | 0.198 |
| Pathologic T 3/ T 4 | 11.91 | 4.35-32.58 | 1.41E-06 | 11220000.00 | 755400-166500000 | <2e-16 |
| Pathologic N 0 | 1(reference) |  |  | 1(reference) |  |  |
| Pathologic N 1 | 2.56 | 0.77-8.46 | 0.122 | 4.24 | 1.046-17.15 | 0.043 |
| Pathologic M 0 | 1(reference) |  |  | 1(reference) |  |  |
| Pathologic M 1/ M X | 2.34 | 0.96-5.7 | 6.23E-02 | 0.38 | 0.089-1.609 | 0.19 |
| Tumor stage Ⅰ | 1(reference) |  |  | 1(reference) |  |  |
| Tumor stage Ⅱ | 1.00 | 0.35-2.84 | 0.999281 | 1.68 | 0.2009-14.11 | 0.631 |
| Tumor stage Ⅲ/Ⅳ | 4.07 | 1.91-8.65 | 2.63E-04 | 8.67E-07 | 5.84E-8-1.29E-9 | <2e-16 |

**Table S6.** Characteristics of cervical cancer patients

| **Characteristic** | **No.** | **%** |
| --- | --- | --- |
| **Age (y), median (range)** | 46(29-70) | 100% |
| **Stage** |  |  |
| IB1 | 12 | 9.2% |
| IB2 | 28 | 21.5% |
| IB3 | 20 | 15.5% |
| IIA1 | 22 | 16.9% |
| IIA2 | 27 | 20.8% |
| IIB | 21 | 16.1% |
| **Histological subtype** |  |  |
| Squamous | 130 | 100% |
| **Differentiation grade** |  |  |
| G1 | 28 | 21.5% |
| G2 | 30 | 23.1% |
| G3 | 32 | 24.6% |
| Unknown | 40 | 30.8% |
| **Postoperative radiotherapy** |  |  |
| Yes | 42 | 32.3% |
| No | 88 | 67.7% |
| **Residual disease** |  |  |
| optimal | 130 | 100% |
